# Supplementary material
Source: PubMed Central journal article supplement (PMC3063587)
Supplement: 1000086107_sapp.pdf [file 1000086107_sapp.pdf]

## SI Text

**Organism.** *Lactobacillus iners* AB-1 is a vaginal isolate from a healthy woman. For DNA isolation for genome sequencing, it was cultured on Columbia blood agar (VWR, DF0792-17) supplemented with 50 ml/L sheep's blood (Cedarlane, DSB050) at 37°C under strict anaerobic conditions.

**Genome assembly.** We received 621,824 reads from 454 pyrosequencing ranging between 100 bp and greater than 600 bp (Next-Gen Sequencing Facility at Iowa State University, Iowa). The reads were trimmed for low quality bases and leftover adapter sequences using the python script, `sff_extract.py` (downloadable at: [http://bioinf.comav.upv.es/sff\\_extract/index.html](http://bioinf.comav.upv.es/sff_extract/index.html)). Of the total reads after trimming, the 68,626 reads greater than 500 bp were used to generate a preliminary assembly using the Minimus assembler (AMOS package) (1). The resulting contigs were used as long reads in combination with the approximately 12 million short (35 nt) paired reads from Illumina (Illumina, Inc. San Diego, California) for paired-end assembly by the Velvet assembly program (2). Contigs greater than 200 bp were retained, and these 47 contigs were used as the backbone for gap closure and scaffolding.

**Gap closure and scaffolding.** To close gaps between contigs, a method of “read walking” was employed. A BLAST database of all 454 reads greater than 500 bp was created using formatdb. Contig ends were BLASTed (3) against the database to find reads with a perfect overlap of at least 300 bp. If no reads matched, the end of the contig was trimmed back until a match could be found, or the required overlap was reduced. Reads matching the ends of contigs were compared to the database of 454 reads using BLAST in order to extend the contig ends until another contig was reached. If no matching reads were uncovered in the dataset of reads greater than 500 bp, a second database including reads greater than 400 bp (262,847 reads) was used. Once inter-contig reads were obtained, gaps between contigs were joined using Minimus (1). This read-walking approach was similarly used to place the rRNA operons by walking out of the contigs identified as 16s and 23s sequence by BLAST to the NCBI non-redundant database. Reads matching the ends of these contigs were imported into JalView (4) where the multiple sequence alignments could be partitioned into separate sequence paths into contig ends. Additional contig joinings used sequence information from an unfinished *Lactobacillus iners* project in the GenBank database (GenBank accession number: ACLN00000000). Mauve was used to evaluate the alignment and contig order between the two datasets (5). Initially, a coverage of 5 reads was required to extend a contig, and upon completion of gap filling all contigs were evaluated for expected sequence coverage and “mate-happiness” between Illumina reads as described below.

By read-walking, the genome was assembled into seven contiguous pieces which were then ordered into a single scaffold of 2 contigs and a total of 1,301,173 bp. Scaffolding order was determined based on maximum synteny with the most closely related organisms, *L. johnsonii* and *L. gasseri*, using the PGA platform (6). The contigs were also oriented and ordered based on expected positions of the rRNA operons (7). Optical Mapping (OpGen, Inc., Madison, Wisconsin) validated contig order and orientation, as well as the expected genome size of 1.3 Mb (Figure S3). Primers were designed for the ends of each scaffolded contig and long-range PCR (Expand Long

Template PCR System, Roche) was used to verify connections between neighboring contigs as predicted by optical mapping. PCR products were electrophoresed on a 1% agarose gel and bands were isolated, gel purified, and submitted for dideoxy chain termination sequencing (London Regional Genomics Institute, London, Ontario). Sanger reads were used to extend contig ends, and read-walking was again performed to close remaining gaps. The majority of contig ends were rRNA operons and the PCR and Sanger sequences confirmed these rRNA placements.

**Validating Genome Coverage.** The final scaffold was independently validated by separately mapping the original Illumina paired reads and the 454 reads and then assessing the expected read coverage. Using Novopaired ([www.novocraft.com](http://www.novocraft.com)), 97.7% of the Illumina paired reads mapped back to the scaffold with unique alignment. The expected distance between read pairs, termed “mate-happiness”, was also evaluated from the Novopaired output to identify areas of compression (mates too close together) or expansion (mates too far apart). We used in-house developed software and the BLAST algorithm to map the 454 reads to the scaffold using cutoffs of 98% ID, 95% read length excluding reads with insertions or deletions compared to the scaffold. Coverage and mate happiness for each final scaffold was visualized using R (8) (Figures S12 and S13). One region identified by optical mapping suggested ~12,000 bases missing in the final assembly (Figure S3). This region had good coverage and mate-happiness by the Illumina reads, but low coverage of 454 reads suggesting short tandem repeats which could not be resolved.

**Annotation.** Open reading frames (ORFs) greater than 100 nt were predicted using GeneMark (9) and by Glimmer (10). The translated ORF predictions were compared to the NCBI non-redundant database (nrdb) using BLASTp to evaluate gene predictions. There were several cases of GeneMark predicted ORFs that were shorter in length compared to homologous sequences in the database, and the corresponding Glimmer prediction better matched the length of the proteins in the database. In these instances, the Glimmer prediction was preferentially retained over the GeneMark prediction in order to prevent overestimation of truncated pseudogenes.

Several tools combined with custom-created Perl scripts were used for the manual annotation of predicted ORFs including: BLAST to NCBI nrdb, COG (Clusters of Orthologous Groups of proteins) (11), and LaCOG (Lactobacillales-specific Clusters of Orthologous protein coding Genes) (12) databases. In addition, automatic annotation results were collected from RAST (Rapid Annotation using Subsystem Technology) (13). Metabolic predictions were made by KAAS (KEGG Automatic Annotation Server) (14). HMMER (<http://hmmer.org/>) was used to search the sortase database ([http://bamics3.cmbi.kun.nl/sortase\\_substrates](http://bamics3.cmbi.kun.nl/sortase_substrates)) for sortase substrates (15). The predicted ORFs were also submitted to Pfam (16) and TMHMM (<http://www.cbs.dtu.dk/services/TMHMM/>) for conserved domain and transmembrane domain predictions respectively. A list of Pfam domains related to adhesion adapted from Kankainen et al. (17) was used to search the predicted ORFs with *E* values of 1e-3 or less considered significant (Table S6). A summary of Surface and exported proteins were identified using SLEP (18). Transporter genes were predicted and annotated by TransAAP

(<http://www.membranetransport.org/>). Transfer RNA (tRNA) genes were identified using tRNAscan-SE (19) Annotation predictions were manually validated.

**Prediction of highly expressed genes (using the codon adaptation index, CAI).** Highly expressed genes show a biased codon usage pattern, and the CAI provides an indication of expression (20). Using the EMBOSS (21) cai tool, the ORF sequence of the generally highly expressed small and large subunits of the ribosomal proteins were used as a reference for calculating the codon adaptation index (CAI) of all the predicted genes in the *L. iners* genome.

**Comparative Genomics.** Comparative genomics of *L. iners* was performed largely using sequence acquired from the GenBank database for *L. crispatus* JV-V01 (GenBank accession: ACKR00000000), *L. johnsonii* NCC 533 (NC\_005362), *L. gasseri* ATCC 33323 (NC\_008530), *L. acidophilus* NCFM (NC\_006814), and *L. delbrueckii* subsp. *bulgaricus* ATCC 11842 (NC\_008054).

Ortholog predictions for each pair of organisms was predicted by InParanoid (22) using the default settings, and custom Perl scripts were developed in-house to merge the datasets into a four-way comparison of overlapping ortholog predictions. The lists were submitted to the 4-way Venn Diagram Generator (<http://www.pangloss.com/seidel/Protocols/venn4.cgi>) and the predicted values were used to generate a figure. Unique proteins were defined as those without ortholog predictions. For simplicity, excluded from the total count were predicted orthologous groups between organism pairs that were not a one-to-one orthologous pairing (if a protein from organism A had more than one predicted ortholog from organism B, and vice versa). Other homology predictions are based on BLAST results to the NCBI nrdb.

**Prediction of horizontally acquired genes.** Predicted protein sequences from *L. iners* AB-1 and from the organisms listed above were compared to the NCBI nrdb by BLAST. Excluding self-hits and hits to the same species, genes were identified as foreign if the three most significant hits ( $E \leq 1E^{-20}$ ) were a genus other than *Lactobacillus* with the most significant hit having at least 60% protein identity to the query sequence.

**Construction of phylogenetic tree of select lactobacilli.** Ribosomal protein sequences were chosen and tested for vertical transmission as outlined by Ciccarelli et al. (23). The following sequences contained clear orthologs in all the organisms and were vertically transmitted: ribosomal protein L1, L10, L11, L13, L15, L16, L17, L18, L2, L20, L21, L22, L23, L24, L27, L29, L3, L4, L5, L6, S10, S11, S12, S13, S20, S3, S4, S5, S7, S8, S9. These concatenated sequences were sent for phylogenetic analysis using the 'one click' mode at [www.phylogeny.fr](http://www.phylogeny.fr) (24). This is a "default" mode which uses a pipeline already set up to run and connect programs recognized for their accuracy and speed (MUSCLE for multiple alignment, Gblocks for alignment curation, PhyML for phylogeny and finally TreeDyn for tree drawing) to reconstruct a robust phylogenetic tree from a set of sequences. The trees of cholesterol-dependent cytolysins (Figures S5 and S6) were created by the same method.

**Cell-wall protein isolation.** Protein isolation was performed using the method adapted from Cole, et al. (25). Briefly, *L. iners* was grown in 25ml MRS broth for 96 hours. The culture was

spun down, the supernatant was removed, and the pellet was frozen at  $-20^{\circ}\text{C}$  until isolation. After thawing, the pellet was washed two times using TES buffer, resuspended in a 10% lysozyme solution in TES, and incubated at  $37^{\circ}\text{C}$  with shaking for 2h. After centrifugation, the supernatant containing the solubilized cell wall-associated proteins was collected. Proteins were precipitated using 10% TCA before separating by size by electrophoresis on SDS-PAGE, and bands were visualization by coomassie blue staining. For Western Blot analysis, the SDS-PAGE electrophoresed proteins were transferred to a polyvinylidene difluoride (PVDF) membrane for immuno-blotting as described below.

**Mass spectrometry.** After isolation of proteins, separation of by SDS-PAGE, and coomassie staining as described above, the visibly stained bands were isolated for mass spectrometry. In-gel digestion was performed using a MassPREP automated digester station (PerkinElmer). Gel pieces were Coomassie destained using 50mM ammonium bicarbonate and 50% acetonitrile (silver de-stained using a 50 mM sodium thiosulphate 5 hydrate and 15 mM potassium ferricyanide solution), which was followed by protein reduction using 10 mM dithiothreitol (DTT), alkylation using 55 mM iodoacetamide (IAA), and tryptic digestion. Peptides were extracted using a solution of 1% formic acid and 2% acetonitrile and lyophilized. Prior to mass spectrometry analysis, dried peptide samples were re-dissolved in a 10% acetonitrile and 0.1 % TFA (trifluoroacetic acid).

MALDI matrix,  $\alpha$ -cyano-4-hydroxycinnamic acid (CHCA), was prepared as 5 mg/mL in 6 mM ammonium phosphate monobasic, 50% acetonitrile, 0.1 % trifluoroacetic acid and mixed with the sample at 1:1 ratio (v/v).

Mass Spectrometry data were obtained using a 4700 Proteomics Analyzer, MALDI TOF TOF (Applied Biosystems, Foster City, CA, USA). Data acquisition and data processing were respectively done using 4000 Series Explorer and Data Explorer (both from Applied Biosystems). The instrument is equipped with a 355 nm Nd:YAG laser; the laser rate is 200 Hz. Reflectron positive ion mode was used and the instrument was calibrated at 50 ppm mass tolerance. Each mass spectrum was collected as a sum of 1000 shots.

Protein identification was made using a local MASCOT (<http://www.matrixscience.com>) server and a custom-build peptide mass database constructed from the predicted protein sequences of *L. iners* AB-1. Search criteria allowed for up to 3 missed cleavage sites and a 50 ppm tolerance, and searches were performed using constant carbamidomethyl and variable oxidation modifications.

**Rabbit polyclonal antisera.** Polyclonal antisera was raised in rabbits using formalin-fixed whole cells of *Lactobacillus iners* AB-1, by ProSci Incorporated (Poway, CA) following a standard two-month protocol.

Whole-cell lysates were prepared from overnight cultures of each of the following ten strains: *Staphylococcus aureus* subsp. Newman, *Escherichia coli* subsp. Nissle, *Atopobium vaginae*, *Gardnerella vaginalis*, *Lactobacillus rhamnosus* GR-1, *Lactobacillus reuteri* RC-14, *Lactobacillus crispatus*, *Lactobacillus gasseri* 33323, *Lactobacillus jensenii* RC-28, and *Lactobacillus johnsonii* ATCC 11506. For each culture, the cells from 1 ml of overnight culture were harvested by centrifugation, resuspended in phosphate-buffered saline (PBS), then lysed using a bead beater. Unlysed cells were subsequently removed by centrifugation and the lysates from all ten cultures were combined. Nitrocellulose membranes (5 × 5 cm squares) were

incubated in the lysate for 1h at room temperature, with the membranes being turned every 15 min. After removing the lysate and washing the membranes 3 × 10 min with tris-buffered saline (TBS), the membranes were blocked for 1 h in 10% skim milk. The polyclonal antisera was incubated with 5 blocked membranes for 60 to 90 min, with the membranes being turned over every 15 min. The membranes were replaced with 5 new membranes and incubation repeated. This process was repeated for a total of 20 membranes, with 100 µL samples being taken after each 5-membrane incubation for analysis by dot blotting.

**Immuno-blot assay.** Immuno-blot assays were performed using the Bio-Rad Goat Anti-Rabbit IgG (H+L) AP Immun-Blot® Assay Kit and the Bio-Rad Alkaline Phosphatase Conjugate Substrate Kit according to the recommendations of the manufacturer. The completeness of the absorption procedure was analyzed using the same ten strains that were used for the absorption protocol (see above) plus *Lactobacillus iners* AB-1.

**Transmission electron microscopy and immunogold labeling.** Overnight monocultures of *L. iners* grown in MRS and self-collected vaginal swabs from healthy volunteers were prepared using a standard method for electron microscopy and immunogold labeling at the Transmission Electron Microscopy Facility, Department of Microbiology and Immunology at the University of Western Ontario. After embedding samples in LR white resin and thin slicing, the sections were placed on 400 mesh nickel grids and treated with the anti-*L. iners* primary rabbit antisera. After washing, samples were then incubated with goat anti-rabbit IgG conjugated to 10nm gold particles (British Biocell International, EM.GAR10 for labeling. Samples were stained with 2% uranyl acetate and examined with a Philips EM 410 microscope.

**Growth assays.** A modified MRS (26) broth was made lacking carbohydrates and with the addition of bromocresol purple as a pH indicator. Carbohydrates were added at a final concentration of 20mg/ml and a final total broth volume of 10ml for each experiment. The carbohydrates tested were: glucose, lactose, mannose, fructose, maltose, and porcine stomach mucin type III (Sigma: M1778) which has a glycoprotein content similar to vaginal mucin (27, 28). Growth was compared to the standard MRS medium used to grow the strain (Difco™ Lactobacilli MRS Broth). Colony forming units (CFU) were enumerated by drop plating serial dilutions of the broth culture onto Columbia blood agar plates every 24h after inoculation. Optical density (OD) readings at 600 nm were also recorded.

## References

1. Sommer D, Delcher A, Salzberg S & Pop M (2007) Minimus: A fast, lightweight genome assembler. *BMC Bioinformatics* 8: 64.
2. Zerbino DR & Birney E (2008) Velvet: Algorithms for de novo short read assembly using de bruijn graphs. *Genome Research* 18: 821-829.
3. Altschul SF, Gish W, Miller W, Myers EW & Lipman DJ (1990) Basic local alignment search tool. *J Mol Biol* 215: 403-410.
4. Waterhouse AM, Procter JB, Martin DMA, Clamp M & Barton GJ (2009) Jalview version 2--a multiple sequence alignment editor and analysis workbench. *Bioinformatics* 25: 1189-1191.
5. Darling ACE, Mau B, Blattner FR & Perna NT (2004) Mauve: Multiple alignment of conserved genomic sequence with rearrangements. *Genome Research* 14: 1394-1403.
6. Zhao F, Zhao F, Li T & Bryant DA (2008) A new pheromone trail-based genetic algorithm for comparative genome assembly. *Nucl.Acids Res.* 36: 3455-3462.

7. de Vries MC, *et al* (2006) Comparative and functional analysis of the rRNA-operons and their tRNA gene complement in different lactic acid bacteria. *Syst Appl Microbiol* 29: 358-367.
8. R Development Core Team (2010) R: A language and environment for statistical computing
9. Isono K, McIninch JD & Borodovsky M (1994) Characteristic features of the nucleotide sequences of yeast mitochondrial ribosomal protein genes as analyzed by computer program GeneMark. *DNA Res* 1: 263-269.
10. Salzberg S, Delcher A, Kasif S & White O (1998) Microbial gene identification using interpolated markov models. *Nucl Acids Res* 26: 544-548.
11. Tatusov R, *et al* (2003) The COG database: An updated version includes eukaryotes. *BMC Bioinformatics* 4: 41.
12. Makarova K, *et al* (2006) Comparative genomics of the lactic acid bacteria. *Proceedings of the National Academy of Sciences* 103: 15611-15616.
13. Aziz R, *et al* (2008) The RAST server: Rapid annotations using subsystems technology. *BMC Genomics* 9: 75.
14. Moriya Y, Itoh M, Okuda S, Yoshizawa AC & Kanehisa M (2007) KAAS: An automatic genome annotation and pathway reconstruction server. *Nucl Acids Res* 35: W182-185.
15. Boekhorst J, de Been MWHJ, Kleerebezem M & Siezen RJ (2005) Genome-wide detection and analysis of cell wall-bound proteins with LPxTG-like sorting motifs. *J Bacteriol* 187: 4928-4934.
16. Finn RD, *et al* (2008) The pfam protein families database. *Nucl Acids Res* 36: D281-288.
17. Kankainen M, *et al* (2009) Comparative genomic analysis of *Lactobacillus rhamnosus* GG reveals pili containing a human- mucus binding protein. *Proceedings of the National Academy of Sciences* 106: 17193-17198.
18. Giombini E, Orsini M, Carrabino D & Tramontano A (2010) An automatic method for identifying surface proteins in bacteria: SLEP. *BMC Bioinformatics* 11: 39.
19. Lowe TM & Eddy SR (1997) tRNAscan-SE: A program for improved detection of transfer RNA genes in genomic sequence. *Nucleic Acids Res* 25: 955-964.
20. Sharp PM & Li W (1987) The codon adaptation index-a measure of directional synonymous codon usage bias, and its potential applications. *Nucl Acids Res* 15: 1281-1295.
21. Rice P, Longden I & Bleasby A (2000) EMBOSS: The European molecular biology open software suite. *Trends in Genetics* 16: 276-277.
22. O'Brien KP, Remm M & Sonnhammer ELL (2005) Inparanoid: A comprehensive database of eukaryotic orthologs. *Nucl Acids Res* 33: D476-480.
23. Ciccarelli FD, *et al* (2006) Toward automatic reconstruction of a highly resolved tree of life. *Science* 311: 1283-1287.
24. Dereeper A, *et al* (2008) Phylogeny.fr: Robust phylogenetic analysis for the non-specialist. *Nucl Acids Res* 36: W465-469.
25. Cole JN, Djordjevic SP & Walker MJ (2008) Isolation and solubilization of gram-positive bacterial cell wall-associated proteins. *2D PAGE: Sample Preparation and Fractionation* 295-311.
26. Man JCD, Rogosa M & Sharpe ME (1960) A medium for the cultivation of lactobacilli. *J Appl Microbiol* 23: 130-135.
27. Hill RRR (1986) Digestion of mucin polysaccharides in vitro by bacteria isolated from the rabbit cecum. *Curr Microbiol* 14: 117-120.
28. Wiggins R, Hicks SJ, Soothill PW, Millar MR & Corfield AP (2001) Mucinases and sialidases: Their role in the pathogenesis of sexually transmitted infections in the female genital tract. *Sexually Transmitted Infections* 77: 402-408.
29. Grant JR & Stothard P (2008) The CGView server: A comparative genomics tool for circular genomes. *Nucleic Acids Res* 36: W181-4.

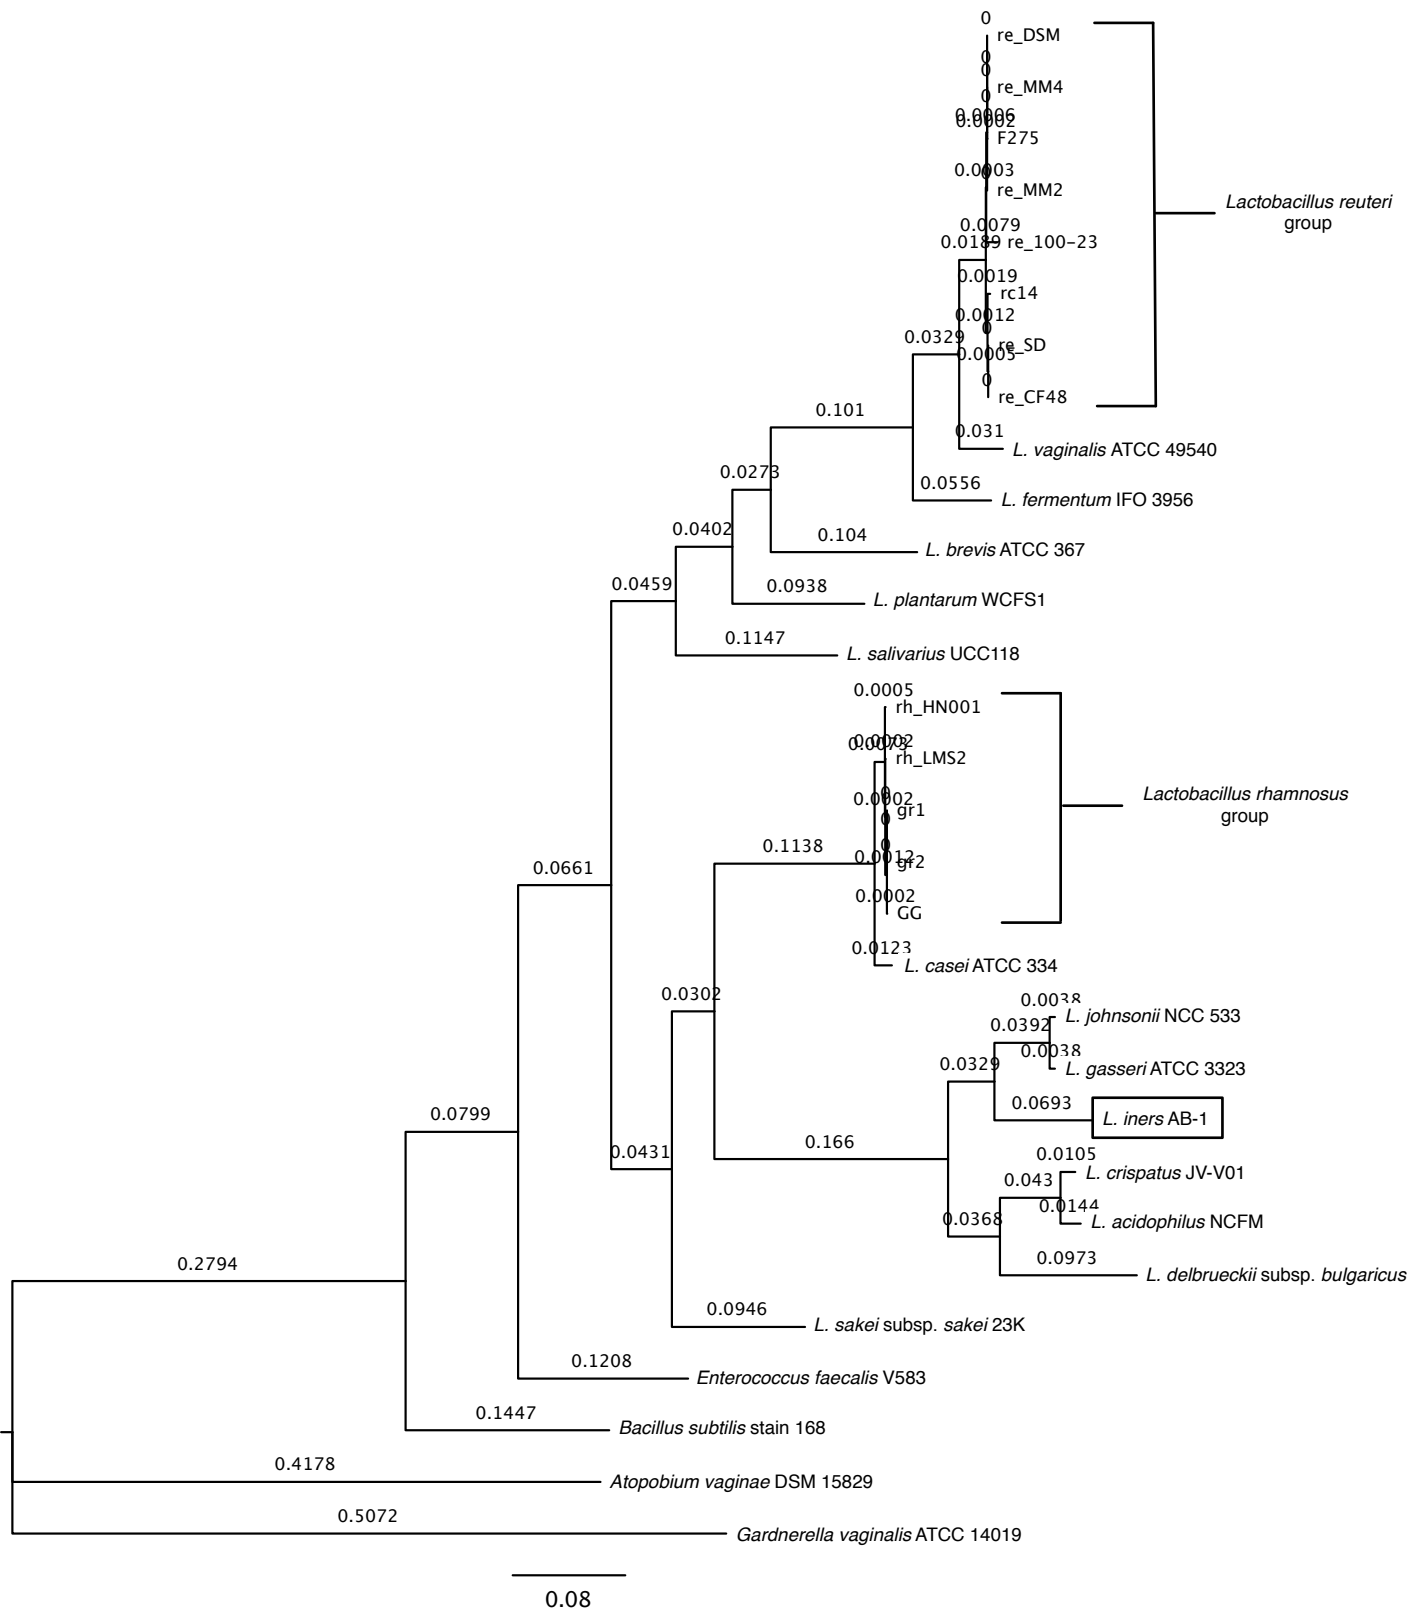

**Figure S1.** Phylogenetic tree constructed using concatenated ribosomal subunit protein sequences obtained from the GenBank database with the addition of sequence from *L. iners* AB-1. Amino acid substitution distances are given for each branch.

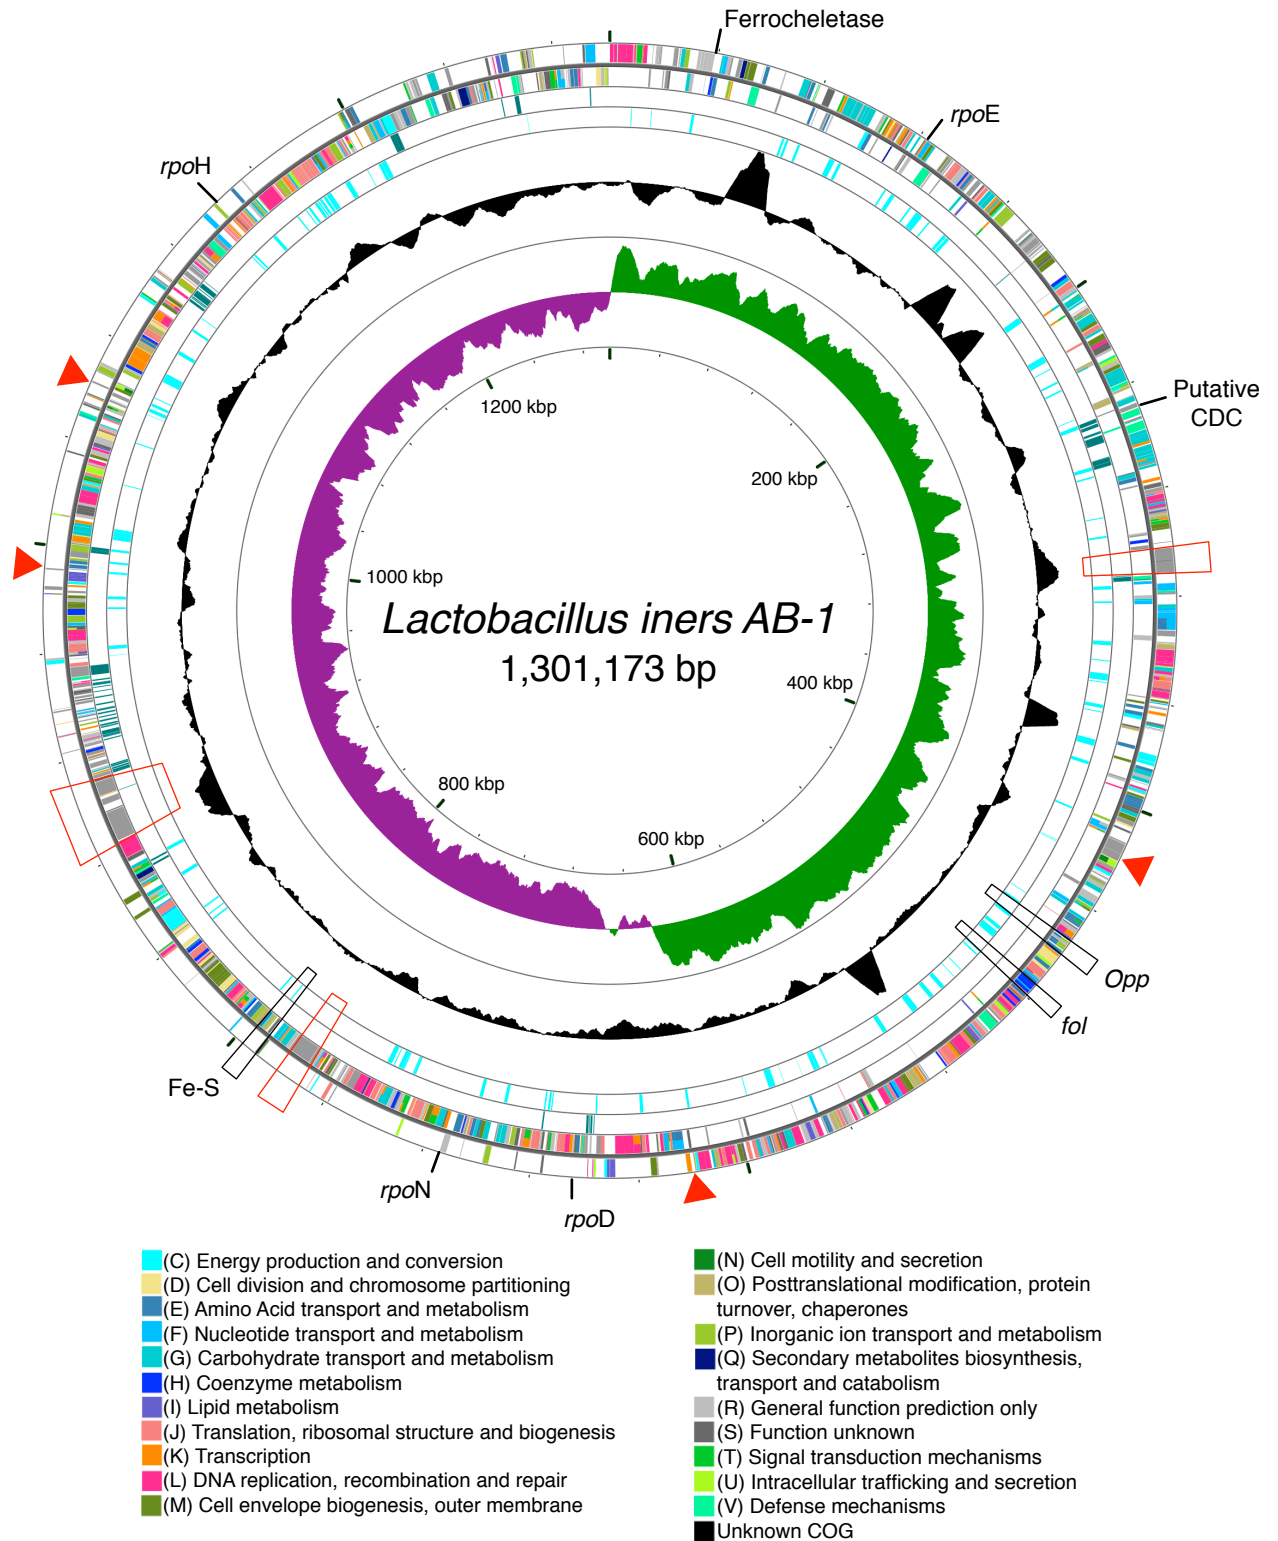

**Figure S2.** Genomic atlas of *L. iners* AB-1. From the outer circle inward: coding regions are marked on the first two rings: outside the dividing line if encoded on the positive strand, and inside the dividing line if encoded on the negative strand. The ORFs are color-coded by COG functional predictions. The third ring (dark green) marks ORFs predicted to be horizontally acquired. The fourth ring (cyan) shows ORFs predicted to be among the top 10% most highly expressed based on CAI. The fifth ring shows local CG content measured in a sliding window as a black plot. The innermost graph shows the CG-skew with sharp changes in skew occurring at the origin and terminus of replication. Genes of interest, as described in text, are marked on the outside of the atlas. Adhesins are marked in red. The atlas was constructed using the CGView Server (29).

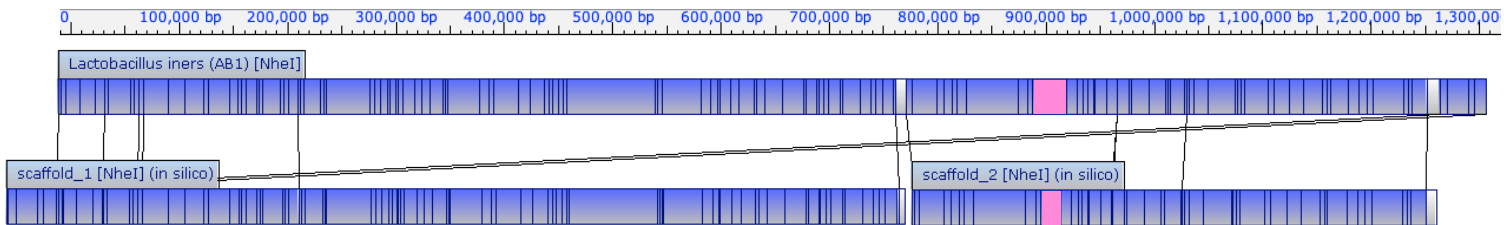

**Figure S3.** Alignment of the *L. iners* genome (2 scaffolds) to the optical map generated from chromosomal DNA cut with NheI. The scaffold sequence was cut in silico for comparison. The optical map confirms the assembled genome size of 1.3 mb. Two breaks of ~10 kb occur in the scaffold assembly due to tandemly repeated sequence (present in the 454 read set, and confirmed by PCR). Highlighted in pink is a region in the genome assembly which is approx. 12,000 bp shorter than the predicted optical map segment. The source of this 12 kb difference is unknown.

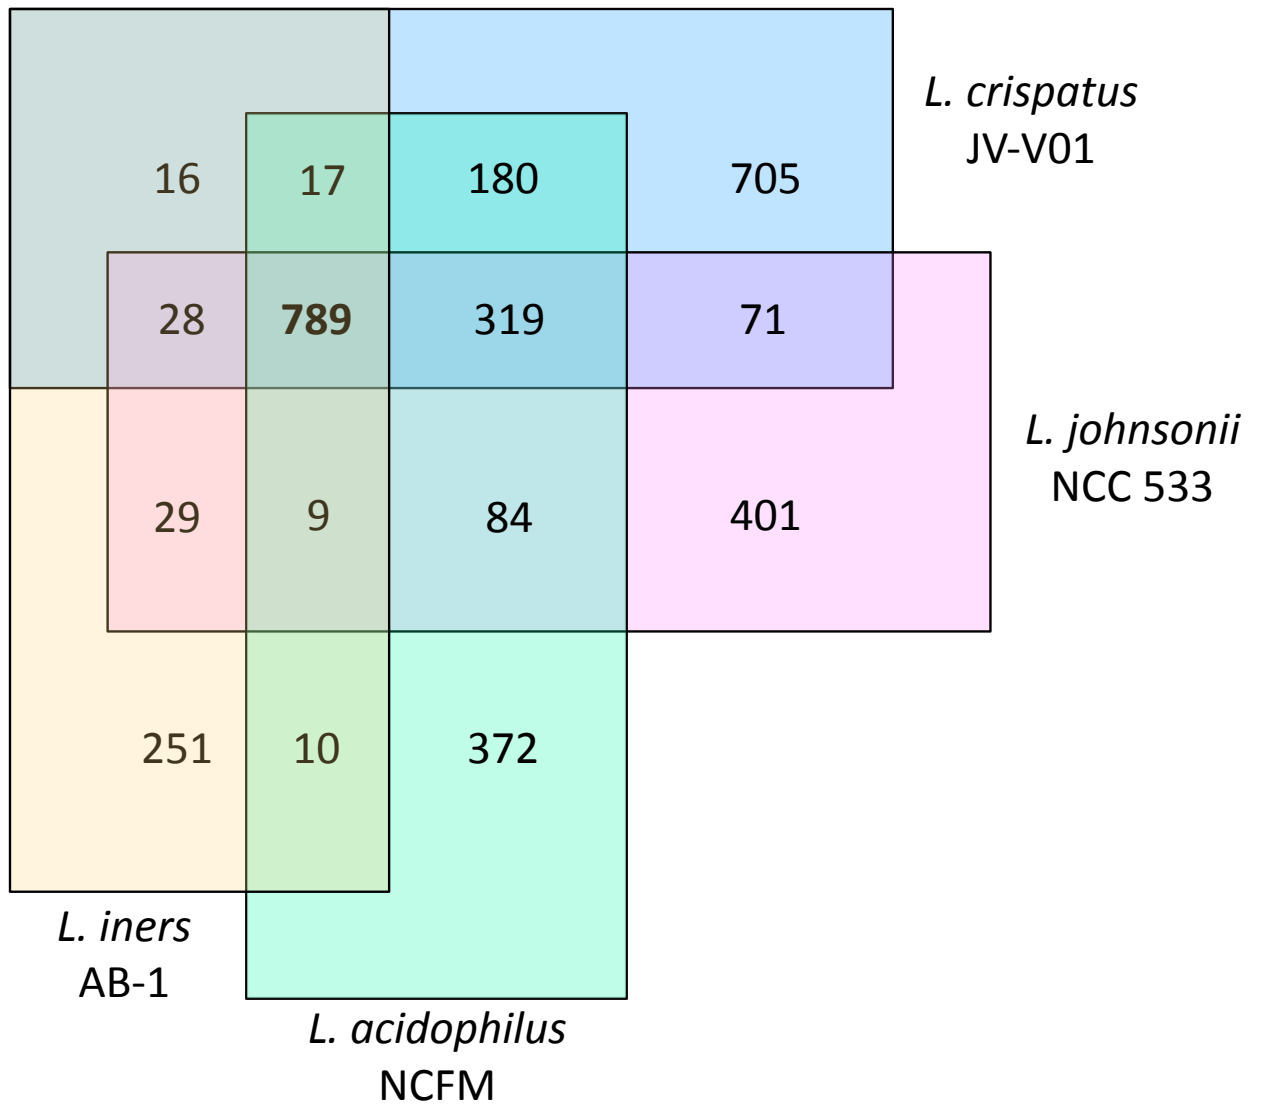

**Figure S4.** Venn diagram representing orthologous proteins between select species of the *L. iners* clade. Values are the number of orthologous genes between overlapping species as predicted by InParanoid.

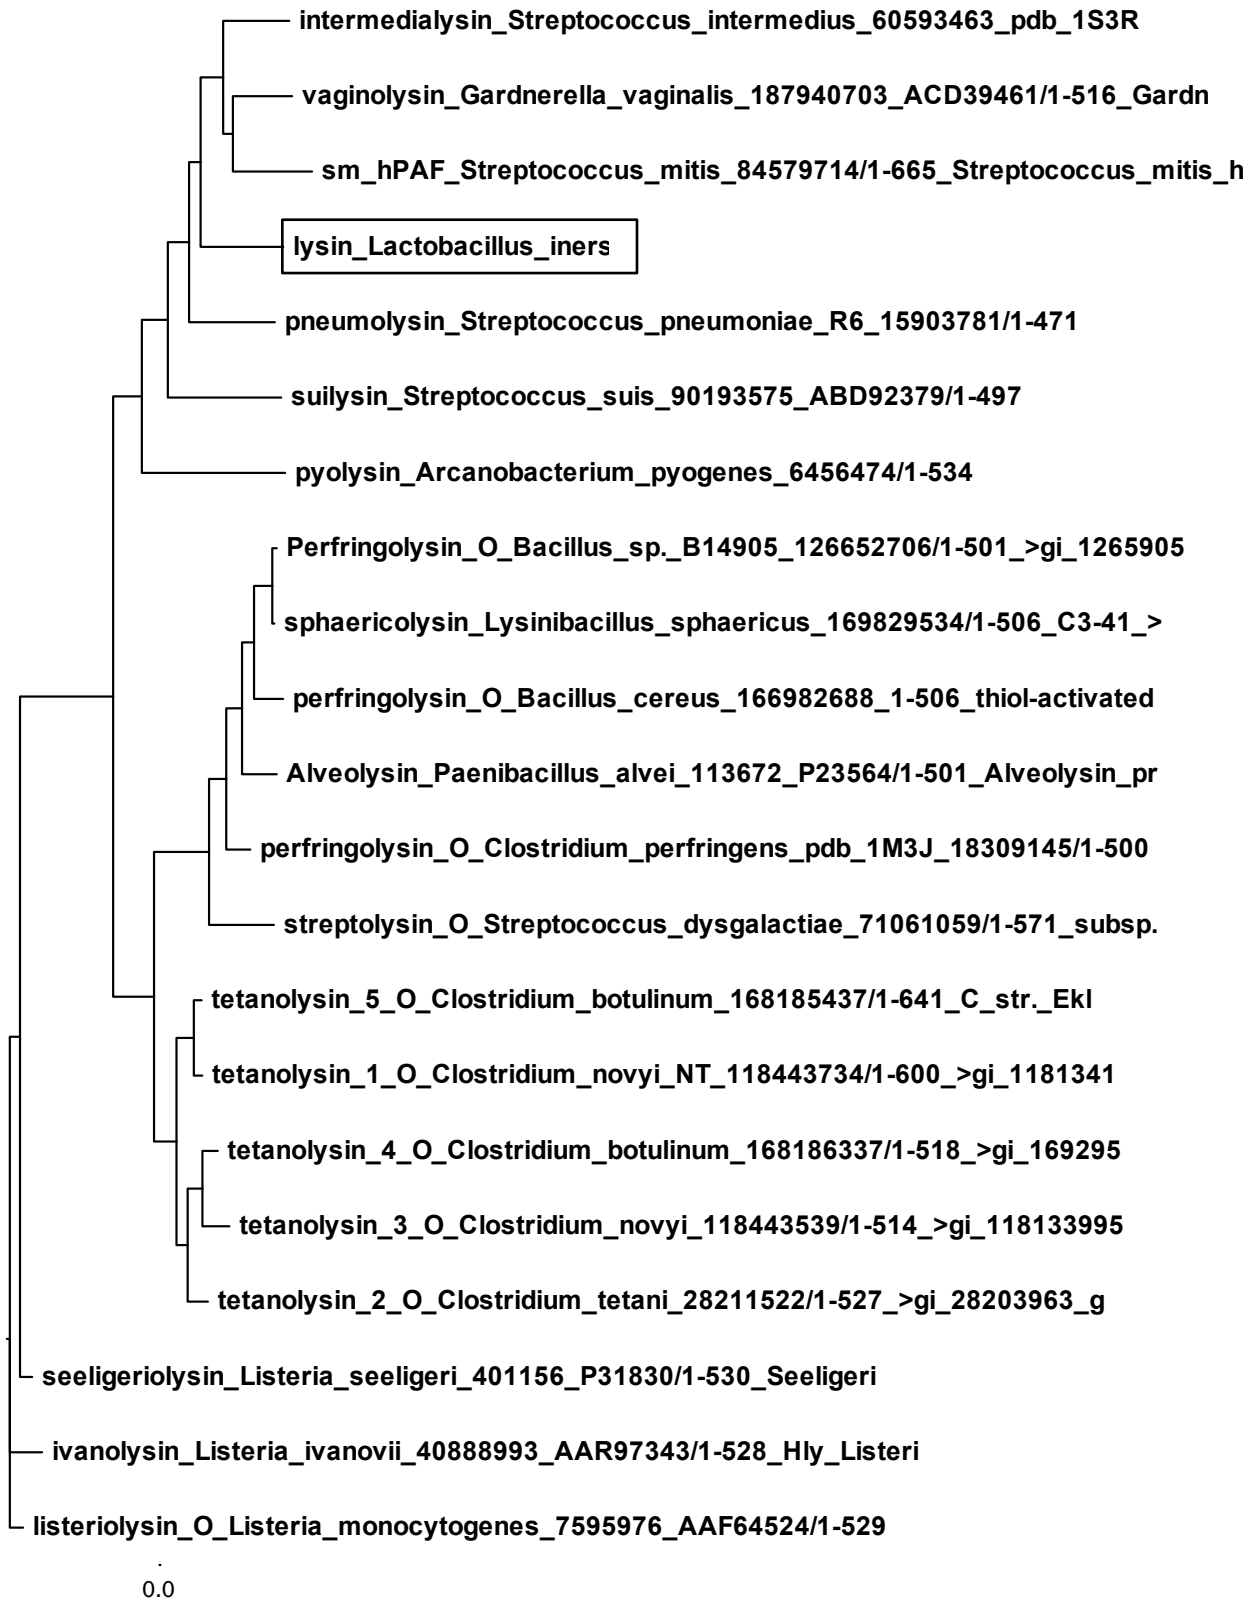

**Figure S5.** Phylogenetic tree constructed of various cholesterol-dependent cytolysins sequence from the GenBank database with the addition of LINAB1\_0216 from *L. iners* AB-1. LINAB1\_0216 is most closely related to the CD59-dependent intermedilysin family, however the binding domain 4 is more closely related to the CD59-independent tetanolysin (Figure S6).



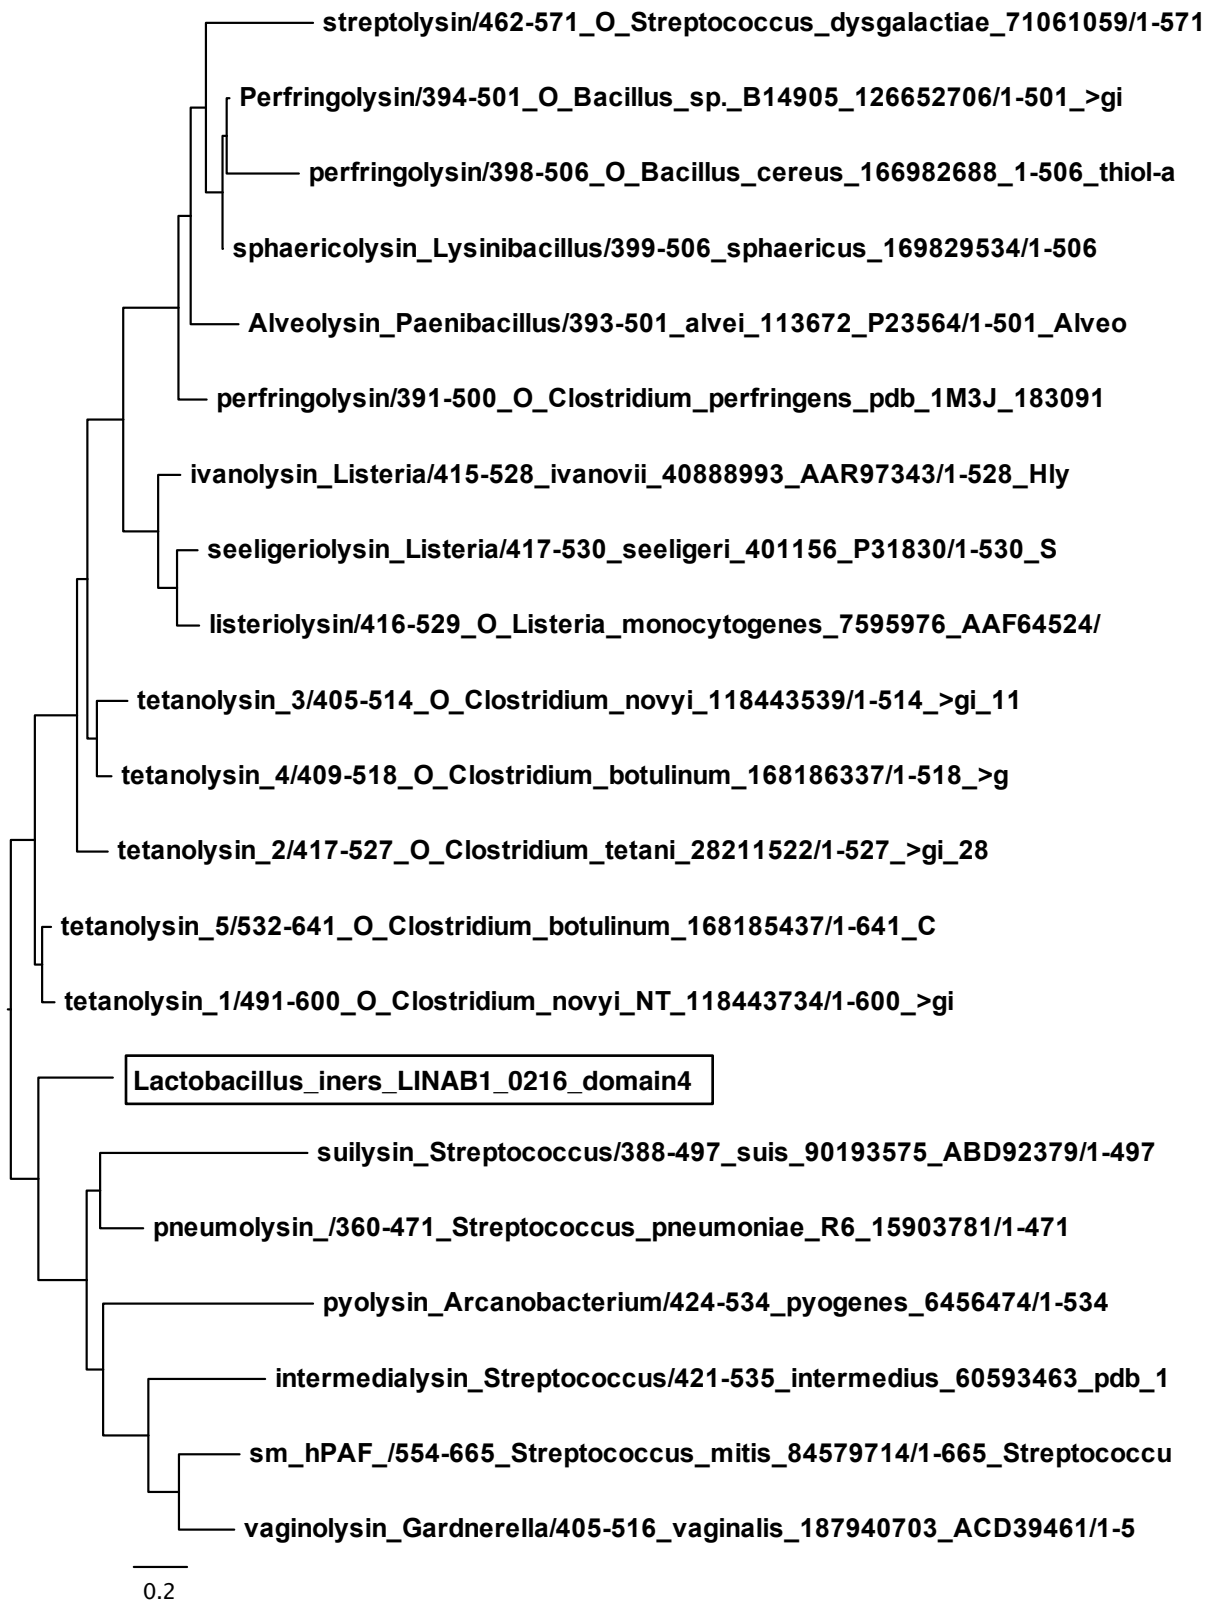

**Figure S6.** Phylogenetic tree constructed of domain 4 of various cholesterol- dependent cytolysins sequence from the GenBank database with the addition of LINAB1\_0216 from *L. iners* AB-1. Domain 4 of LINAB1\_0216 is most closely related to CD59- independent tetanolysin.

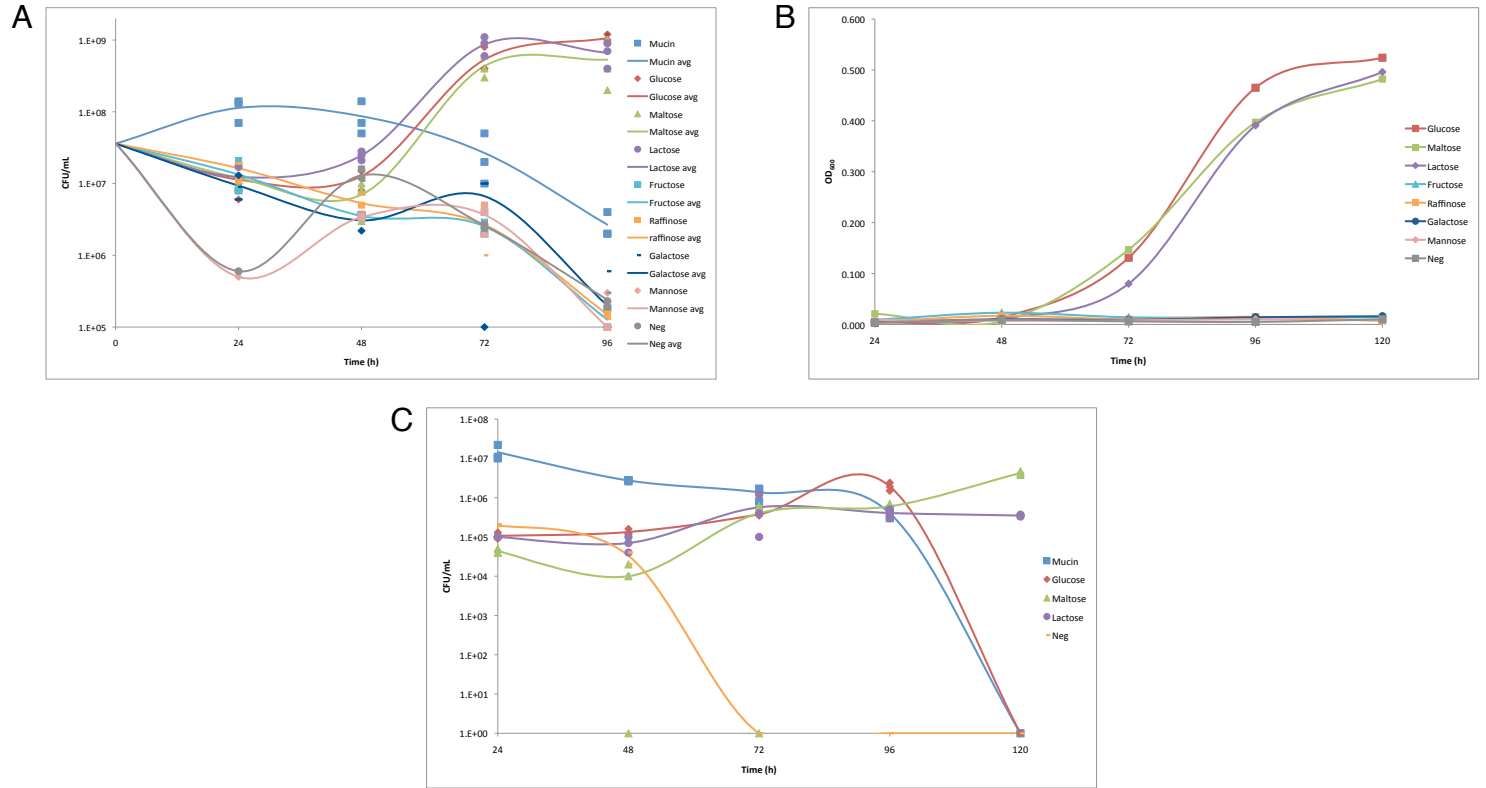

**Figure S7.** Representative growth of *L. iners* AB-1 in modified MRS substituted with various carbohydrate sources. Drop plates of serial dilutions of the broth cultures were performed every 24h after initial inoculation, and colony forming units (CFU) were enumerated after 72h incubation on Columbia blood agar (A). Additional to the CFU analysis, optical density (OD) readings at 600 nm were recorded every 24h (B). Repeating the experiment demonstrated similar growth patterns (C). Growth in mucin peaks shortly after initial inoculation at 24h while glucose, maltose, and lactose demonstrate peak growth at 96h. No growth was observed in fructose, raffinose, galactose, or mannose.

# FOLATE BIOSYNTHESIS

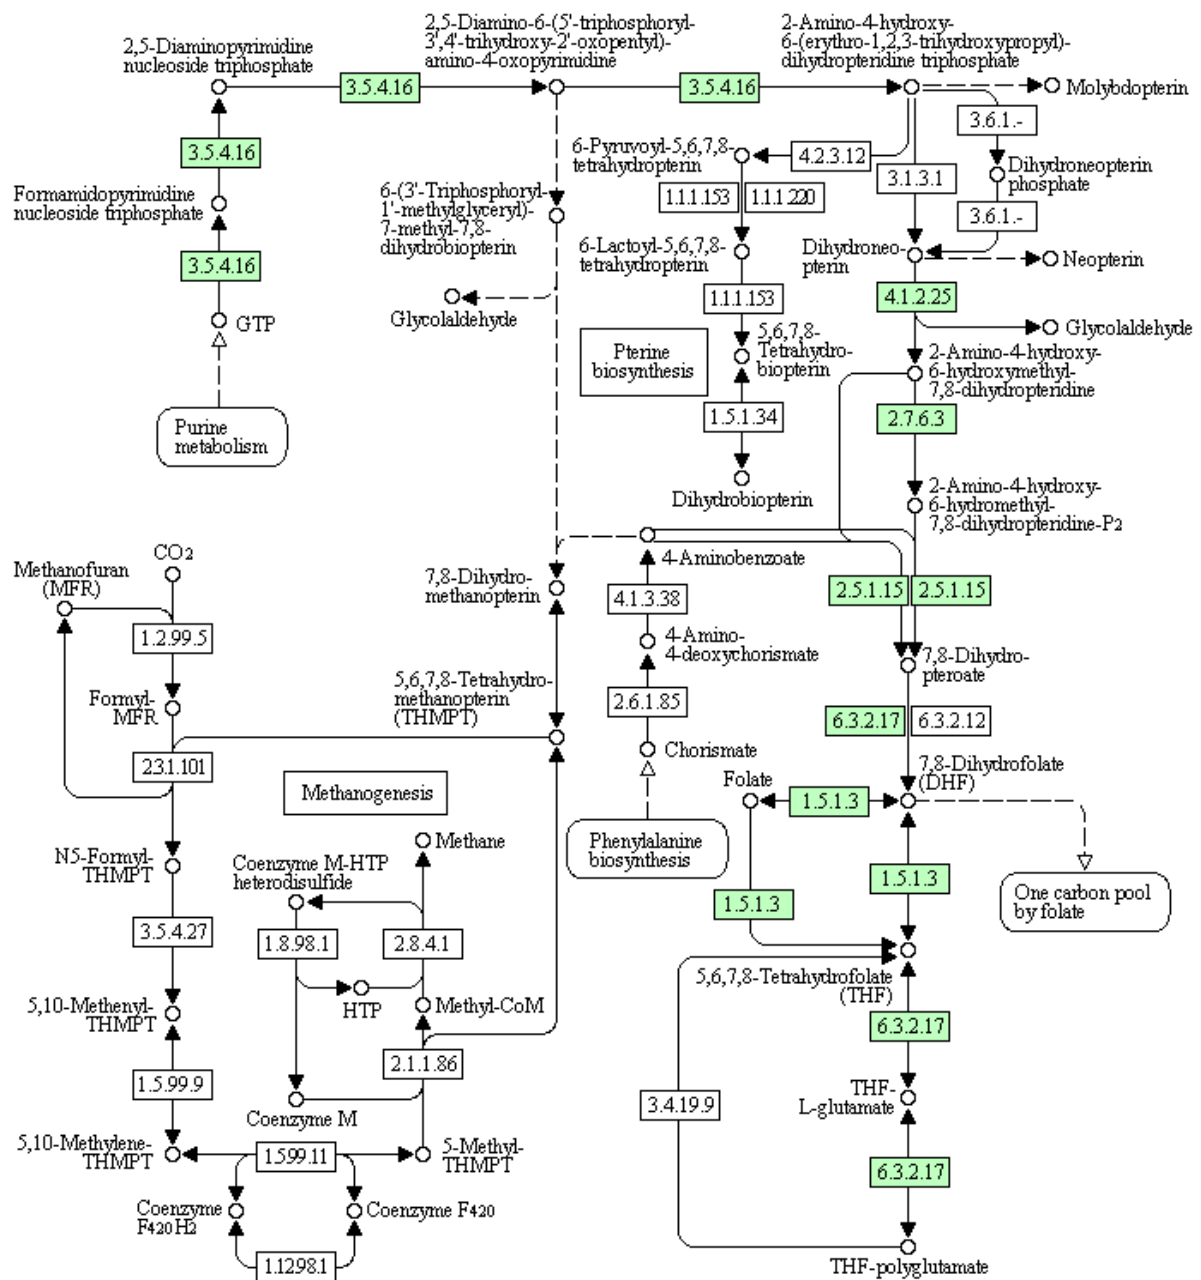

00790 9/1/09  
 (c) Kanehisa Laboratories

**Figure S8.** Folate synthesis pathway as predicted by KAAS. The genes present in *L. iners* AB-1 are shaded in green.

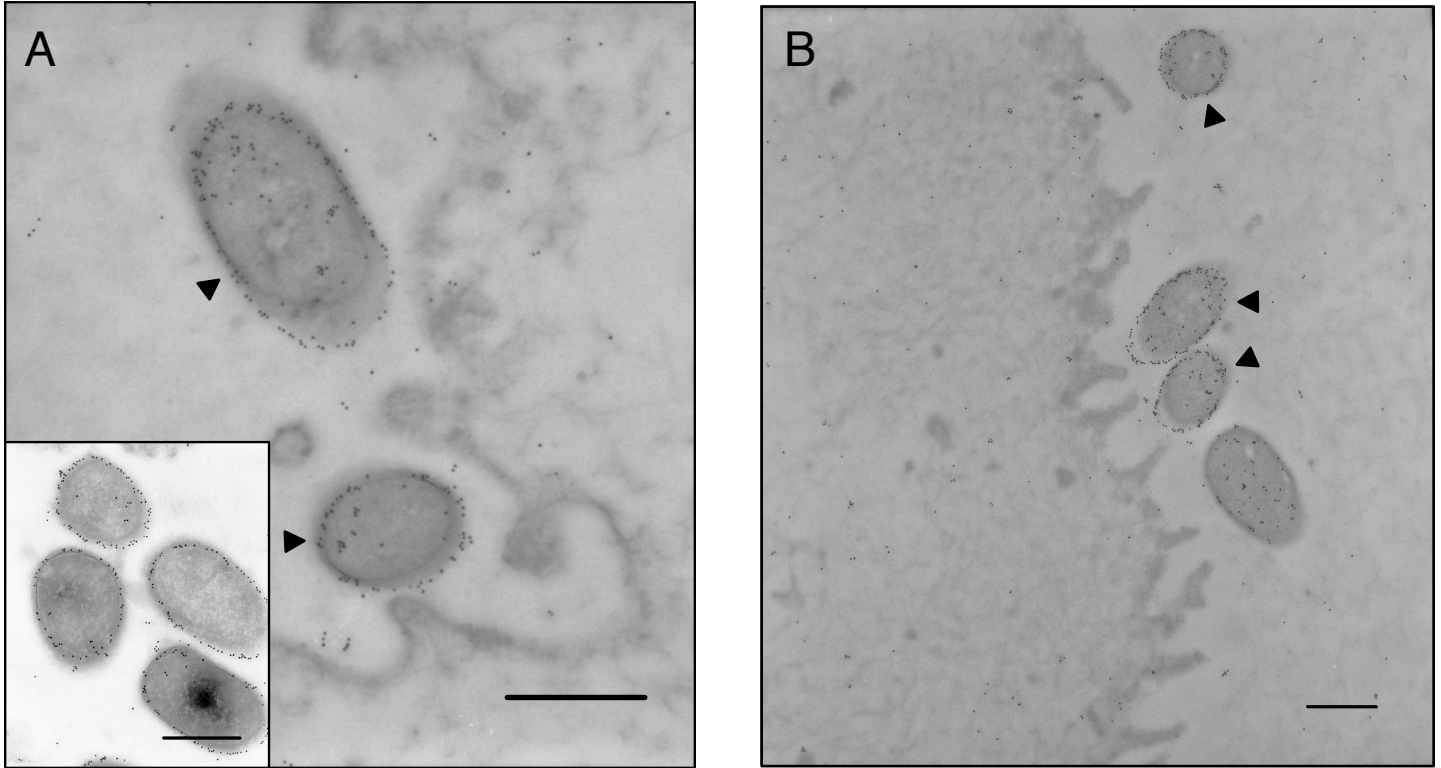

**Figure S9.** Transmission electron micrograph of immunogold labeled *L. iners*. Polyclonal antisera was raised in rabbits against formalin-fixed whole cells of *Lactobacillus iners* AB-1. The gold-labeled (10 nm) antibody appears specific for cell surface structures on the *L. iners* cell as shown by the inset micrograph of labeled *L. iners* monoculture (A). Vaginal swab samples collected from healthy women show well-labeled *L. iners* cells (black arrows) in association with the vaginal epithelial cells (A main panel and B). The scale bars represent 500 nm.

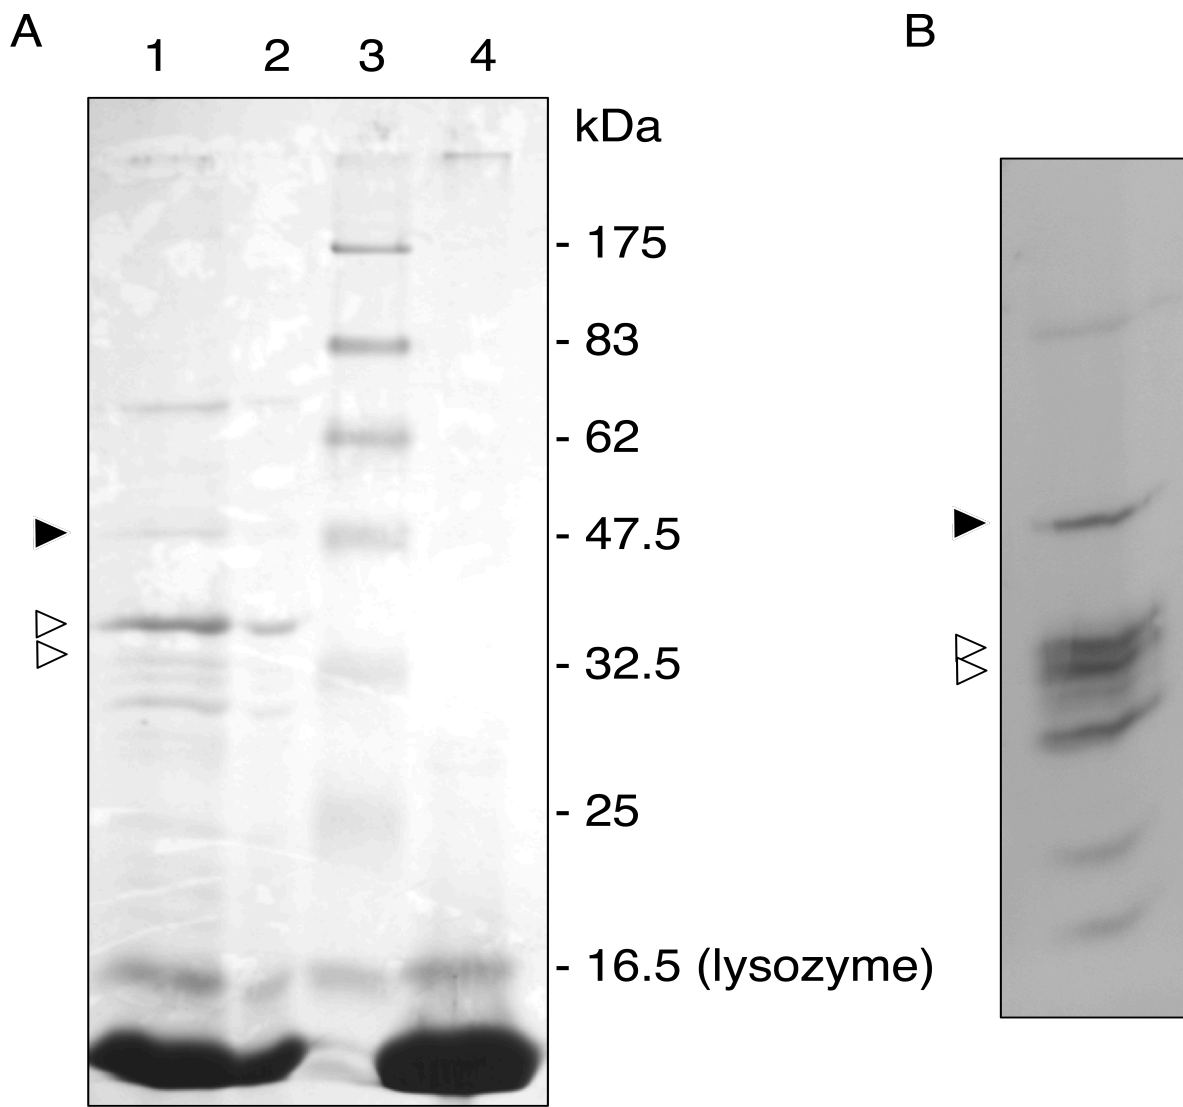

**Figure S10.** Coomassie stained SDS-PAGE (A) of cell-wall protein extract from *L. iners* AB-1 (lanes 1 and 2), molecular weight marker (lane 3), and lysozyme (lane 4). Molecular marker sizes in kDa are indicated. Bands confirmed to bind the *L. iners* polyclonal antisera by Western Blot (B) were extracted for mass spectrometry. The band indicated with the black arrow was identified as a unique cell surface protein containing a YSIRK signal peptide (LINAB1\_0950). Two bands annotated with the white arrows were identified as an ABC-type transporter component (LINAB1\_0341, 47219 kDa and 48% protein coverage with 12 masses) and L-lactate dehydrogenase (LINAB1\_0978, 35025 kDa, 24% protein coverage with 9 peptide masses).

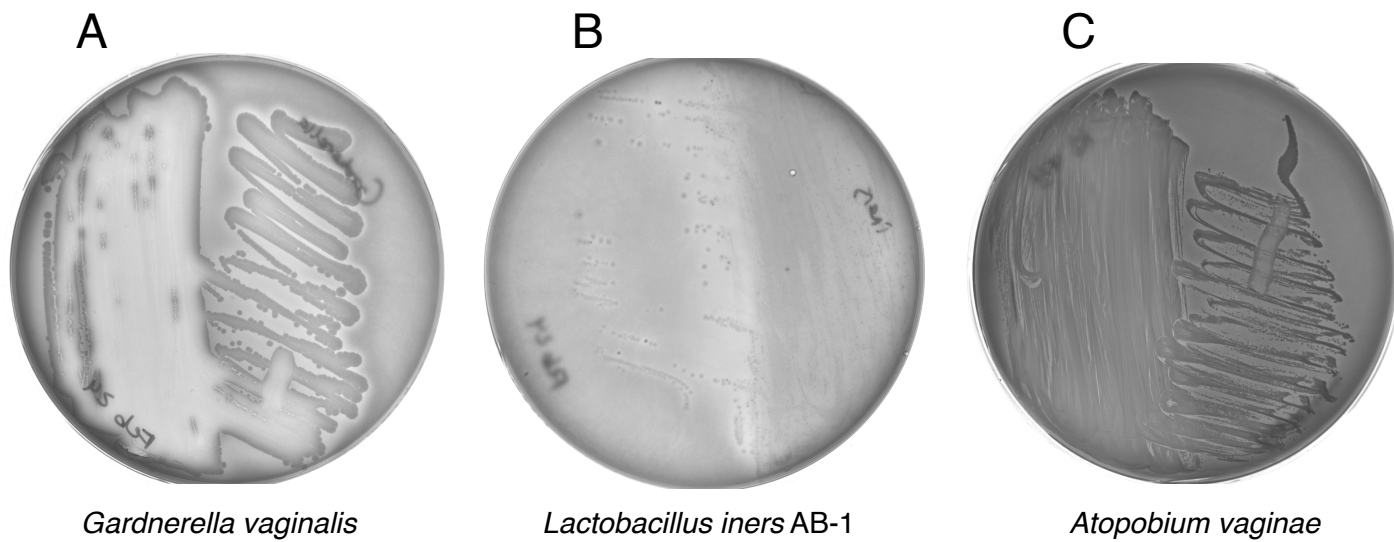

**Figure S11.** Vaginally-associated bacterial species grown on sheep's blood agar and photographed with transmitted white light. Hemolytic activity is observed as clearing of the blood agar by *Gardnerella vaginalis*, and to a lesser extent, *L. iners* AB-1. Single colonies display a zone of red blood cell clearing. In contrast, *Atopobium vaginae*, which is not predicted to contain a hemolysin, does not exhibit hemolytic activity.

**Figure S12.** Coverage map of Illumina reads mapped to the *L. iners* AB-1 assembled genome using Novopaired (figure available at [http://www.biochem.uwo.ca/data/Coverage\\_ill.pdf](http://www.biochem.uwo.ca/data/Coverage_ill.pdf)). Reads mapped perfectly to the sequence with mate pairs the expected distance apart are represented by the blue plot with the height of the plot the measure of coverage. Yellow regions are areas of mate pairs too far apart, while cyan mate pairs are too close together. Note that there is uniform coverage across the vast majority of the genome with the exception of the ribosomal operons (regions of no coverage). Regions with low or high coverage, and regions of compressed or expanded mate pairs have been confirmed by either or all of: a) read walking, b) 454 read coverage (Figure S13), or c) by PCR.

**Figure S13.** Coverage map of 454 reads mapped to the *L. iners* AB-1 assembled genome using BLAST (figure available at [http://www.biochem.uwo.ca/data/Coverage\\_400.pdf](http://www.biochem.uwo.ca/data/Coverage_400.pdf)). Reads mapped perfectly to the sequence are represented by the blue plot with the height of the plot the measure of coverage. Red regions are areas with low coverage. Note that there is uniform coverage across the vast majority of the genome with the exception of the ribosomal operons (regions of no coverage). Regions with low or high coverage have been confirmed by either or all of: a) read walking, b) Illumina read coverage (Figure S12), or c) by PCR.



**Table S1. General genome features of *L. iners* AB-1**

|                                       |              |
|---------------------------------------|--------------|
| <b>Genome Size</b>                    | 1.3mb        |
| <b>GC Content, %</b>                  | 32.6         |
| <b>% coding</b>                       | 87.6         |
| <b>Total number of predicted ORFs</b> | 1190         |
| ORFs with BLAST $\leq 1e-10$          | 1093 (91.8%) |
| ORFs with COG functional assignment   | 956 (80%)    |
| <b>rRNA operons</b>                   | 6            |
| <b>Plasmids</b>                       | None         |

**Table S2. Predicted pseudogenes of *L. iners* AB-1**

| ORF         | Annotation                                                                                                                                              | Length (AA) | HGT | Best hit to NCBI nrdb           | Annotation of NCBI hit                                                                                                                                   | Length of hit (AA) | e-val    | %ID   | ORF length/hit length | COG number | COG class |
|-------------|---------------------------------------------------------------------------------------------------------------------------------------------------------|-------------|-----|---------------------------------|----------------------------------------------------------------------------------------------------------------------------------------------------------|--------------------|----------|-------|-----------------------|------------|-----------|
| LINAB1_0276 | hypothetical protein                                                                                                                                    | 70          | *   | gi 210623096 ref ZP_03293583.1  | hypothetical protein CLOHIR_01533 [Clostridium hiranonis DSM 13275]                                                                                      | 1077               | 6.00E-25 | 81.69 | 0.065                 | -          | -         |
| LINAB1_0277 | hypothetical protein                                                                                                                                    | 76          | *   | gi 221076936 ref ZP_03548214.1  | hypothetical protein BLAHAN_02002 [Blautia hansenii DSM 20583]                                                                                           | 1035               | 3.00E-23 | 73.24 | 0.073                 | -          | -         |
| LINAB1_0025 | hypothetical protein                                                                                                                                    | 38          |     | gi 58336381 ref YP_192966.1     | putative integrase [Lactobacillus acidophilus NCFM]                                                                                                      | 411                | 3.00E-14 | 92.31 | 0.092                 | -          | -         |
| LINAB1_0026 | possible integrase                                                                                                                                      | 68          |     | gi 58336381 ref YP_192966.1     | putative integrase [Lactobacillus acidophilus NCFM]                                                                                                      | 411                | 7.00E-22 | 97.06 | 0.165                 | -          | -         |
| LINAB1_0845 | hypothetical protein, phage-related                                                                                                                     | 65          |     | gi 77411267 ref ZP_00787617.1   | phage portal protein, HK97 family [Streptococcus agalactiae CJB111]                                                                                      | 358                | 3.00E-12 | 68    | 0.182                 | 4695       | S         |
| LINAB1_0800 | Putative cell-surface protein containing YSIRK and Gram-pos anchor ABC-type multidrug/protein/lipid transport system, SunT-containing, ATPase component | 1804        |     | gi 223043087 ref ZP_03613134.1  | conserved hypothetical protein [Staphylococcus capitis SK14] ABC superfamily ATP binding cassette transporter ABC protein [Lactobacillus gasseri JV-V03] | 9801               | 1.00E-97 | 30.7  | 0.184                 | -          | -         |
| LINAB1_0063 | ATPase component                                                                                                                                        | 106         |     | gi 227521926 ref ZP_03951975.1  | terminase, large subunit, putative [Dehalococcoides ethenogenes 195]                                                                                     | 537                | 5.00E-40 | 92.31 | 0.197                 | 2274       | V         |
| LINAB1_0847 | Phage terminase-like protein, large subunit                                                                                                             | 107         | *   | gi 57234156 ref YP_181803.1     | SPP1 gp7 family phage head morphogenesis protein [Lactobacillus ruminis ATCC 25644]                                                                      | 535                | 1.00E-46 | 84.11 | 0.200                 | 4626       | R         |
| LINAB1_0149 | hypothetical protein                                                                                                                                    | 88          |     | gi 227527121 ref ZP_03957170.1  | ABC transporter ATPase component [Lactobacillus helveticus DPC 4571]                                                                                     | 436                | 2.00E-16 | 58.21 | 0.202                 | -          | -         |
| LINAB1_0064 | ABC transporter ATPase component                                                                                                                        | 110         |     | gi 161507527 ref YP_001577481.1 | hypothetical protein FMG_0943 [Finegoldia magna ATCC 29328]                                                                                              | 537                | 3.00E-49 | 89.09 | 0.205                 | 1121       | P         |
| LINAB1_0994 | conserved hypothetical protein                                                                                                                          | 98          | *   | gi 169824640 ref YP_001692251.1 | hypothetical protein ANACAC_00739 [Anaerostipes caccae DSM 14662]                                                                                        | 446                | 4.00E-36 | 89.53 | 0.220                 | -          | -         |
| LINAB1_0844 | phage portal family protein                                                                                                                             | 101         | *   | gi 167746044 ref ZP_02418171.1  | possible mucus binding protein precursor Mub [Lactobacillus jensenii JV-V16]                                                                             | 448                | 2.00E-37 | 74.26 | 0.225                 | 4695       | S         |
| LINAB1_0795 | Putative cell-surface protein containing YSIRK and Gram-pos anchor                                                                                      | 2258        |     | gi 227526342 ref ZP_03956391.1  | 50S ribosomal protein L13 [Lactobacillus acidophilus NCFM]                                                                                               | 9775               | 7.00E-12 | 64.71 | 0.231                 | 419        | L         |
| LINAB1_1046 | LSU ribosomal protein L13                                                                                                                               | 39          |     | gi 58336661 ref YP_193246.1     | conserved hypothetical protein [Anaerococcus lactolyticus ATCC 51172]                                                                                    | 147                | 5.00E-14 | 94.87 | 0.265                 | 102        | J         |
| LINAB1_0835 | hypothetical protein                                                                                                                                    | 75          | *   | gi 227486554 ref ZP_03916870.1  | hypothetical protein CLONEX_03262 [Clostridium nexile DSM 1787]                                                                                          | 271                | 8.00E-25 | 77.33 | 0.277                 | -          | -         |
| LINAB1_0274 | hypothetical nicotinate-nucleotide pyrophosphorylase (carboxylating)                                                                                    | 86          | *   | gi 210616336 ref ZP_03291041.1  | conserved hypothetical protein [Gardnerella vaginalis ATCC 14019]                                                                                        | 299                | 1.00E-20 | 62.96 | 0.288                 | 157        | H         |
| LINAB1_0369 | hypothetical protein                                                                                                                                    | 904         |     | gi 227507189 ref ZP_03937238.1  | cytidine deaminase [Mobiluncus curtisii ATCC 43063]                                                                                                      | 3104               | 3.00E-32 | 29.32 | 0.291                 | -          | -         |
| LINAB1_0833 | putative cysteine deaminase (truncated)                                                                                                                 | 53          |     | gi 227494012 ref ZP_03924328.1  | integral membrane protein [Lactobacillus jensenii JV-V16]                                                                                                | 181                | 6.00E-15 | 98.11 | 0.293                 | 295        | F         |
| LINAB1_0329 | integral membrane protein                                                                                                                               | 63          |     | gi 227525479 ref ZP_03955528.1  | phage head morphogenesis protein, SPP1 gp7 family [Streptococcus suis 89/1591]                                                                           | 201                | 2.00E-13 | 64.41 | 0.313                 | 4478       | S         |
| LINAB1_0181 | conserved hypothetical protein                                                                                                                          | 157         |     | gi 223933186 ref ZP_03625177.1  | Gmk, guanylate kinase [Lactobacillus jensenii 1153]                                                                                                      | 489                | 1.00E-33 | 48.25 | 0.321                 | -          | -         |
| LINAB1_0115 | Guanylate kinase, truncated                                                                                                                             | 61          |     | gi 226817517 ref ZP_03806785.1  | acyl-CoA thioesterase [Anaerococcus tetradius ATCC 35098]                                                                                                | 185                | 2.00E-12 | 59.32 | 0.330                 | -          | -         |
| LINAB1_0820 | possible acyl-CoA thioesterase                                                                                                                          | 117         | *   | gi 227500902 ref ZP_03930951.1  | possible autolysin [Lactobacillus jensenii JV-V16]                                                                                                       | 341                | 3.00E-50 | 82.05 | 0.343                 | -          | -         |
| LINAB1_0710 | conserved hypothetical protein                                                                                                                          | 212         |     | gi 227525759 ref ZP_03955808.1  | phage head morphogenesis protein, SPP1 gp7 family [Lactobacillus reuteri 100-23]                                                                         | 606                | 3.00E-17 | 33.94 | 0.350                 | -          | -         |
| LINAB1_0150 | phage head morphogenesis protein partial ABC superfamily ATP binding cassette transporter, permease component                                           | 169         |     | gi 194466762 ref ZP_03072749.1  | ABC transporter, permease protein [Lactobacillus delbrueckii subsp. bulgaricus ATCC 11842]                                                               | 481                | 4.00E-37 | 51.32 | 0.351                 | -          | -         |
| LINAB1_1120 | putative integrase                                                                                                                                      | 90          |     | gi 104773361 ref YP_618341.1    | putative integrase [Finegoldia magna ATCC 29328]                                                                                                         | 248                | 2.00E-18 | 51.65 | 0.363                 | 4587       | R         |
| LINAB1_0219 | phage integrase                                                                                                                                         | 122         | *   | gi 169825072 ref YP_001692683.1 | integrase [Lactobacillus reuteri CF48-3A]                                                                                                                | 327                | 3.00E-57 | 86.07 | 0.373                 | 4974       | L         |
| LINAB1_1004 | permease of the major facilitator superfamily                                                                                                           | 152         |     | gi 227545543 ref ZP_03975592.1  | MFS family major facilitator transporter [Enterococcus faecium TX1330]                                                                                   | 405                | 2.00E-31 | 43.15 | 0.375                 | 4974       | L         |
| LINAB1_0268 | conserved hypothetical protein                                                                                                                          | 182         |     | gi 227552344 ref ZP_03982393.1  | conserved hypothetical protein [Gardnerella vaginalis ATCC 14019]                                                                                        | 457                | 2.00E-11 | 35    | 0.398                 | -          | -         |
| LINAB1_0368 | conserved hypothetical protein                                                                                                                          | 1273        |     | gi 227507189 ref ZP_03937238.1  | conserved hypothetical protein [Anaerococcus tetradius ATCC 35098]                                                                                       | 3104               | 5.00E-69 | 31.67 | 0.410                 | -          | -         |
| LINAB1_0180 | conserved hypothetical protein                                                                                                                          | 122         |     | gi 227500279 ref ZP_03930348.1  | replication associated protein [Lactobacillus gasseri JV-V03]                                                                                            | 285                | 4.00E-15 | 35.4  | 0.428                 | -          | -         |
| LINAB1_0113 | conserved hypothetical protein                                                                                                                          | 53          |     | gi 227522066 ref ZP_03952115.1  | hypothetical protein CLOBAR_01930 [Clostridium bartlettii DSM 16795]                                                                                     | 123                | 5.00E-11 | 80.95 | 0.431                 | -          | -         |
| LINAB1_0220 | type I restriction-modification system, subunit S                                                                                                       | 179         | *   | gi 164688285 ref ZP_02212313.1  | transcriptional regulator [Lactobacillus jensenii JV-V16]                                                                                                | 405                | 4.00E-55 | 60    | 0.442                 | 732        | V         |
| LINAB1_0023 | transcriptional regulator                                                                                                                               | 126         |     | gi 227525202 ref ZP_03955251.1  | hypothetical protein ApreDRAFT_14040 [Anaerococcus prevotii DSM                                                                                          | 282                | 3.00E-16 | 53.26 | 0.447                 | -          | -         |
| LINAB1_0988 | conserved hypothetical protein                                                                                                                          | 101         | *   | gi 228003647 ref ZP_04050634.1  |                                                                                                                                                          | 218                | 3.00E-32 | 76.04 | 0.463                 | -          | -         |

|             |                                                                      |      |   |                                 |                                                                               |      |           |       |       |      |    |
|-------------|----------------------------------------------------------------------|------|---|---------------------------------|-------------------------------------------------------------------------------|------|-----------|-------|-------|------|----|
| LINAB1_0841 | conserved hypothetical protein                                       | 162  | * | gi 126699471 ref YP_001088368.1 | 20548]<br>hypothetical protein CD1860 [Clostridium difficile 630]             | 348  | 4.00E-81  | 92.99 | 0.466 | 4804 | S  |
| LINAB1_1108 | Alpha-glycerophosphate oxidase, putative                             | 286  | * | gi 125718626 ref YP_001035759.1 | Alpha-glycerophosphate oxidase, putative [Streptococcus sanguinis SK36]       | 608  | 1.00E-102 | 60.56 | 0.470 | 578  | C  |
| LINAB1_1159 | di- and tricarboxylate transporter                                   | 174  |   | gi 227889084 ref ZP_04006889.1  | di- and tricarboxylate transporter [Lactobacillus johnsonii ATCC 33200]       | 368  | 1.00E-63  | 77.78 | 0.473 | 1055 | P  |
| LINAB1_0275 | type I site-specific deoxyribonuclease                               | 493  | * | gi 221076936 ref ZP_03548214.1  | hypothetical protein BLAHAN_02002 [Blautia hansenii DSM 20583]                | 1035 | 0         | 78.4  | 0.476 | 610  | V  |
| LINAB1_0273 | Putative cell-surface protein containing Gram-pos anchor             | 1457 |   | gi 227516270 ref ZP_03946319.1  | possible biofilm-associated protein [Atopobium vaginae DSM 15829]             | 2902 | 1.00E-37  | 26.38 | 0.502 | -    | -  |
| LINAB1_0502 | competence protein ComEC                                             | 382  |   | gi 227889787 ref ZP_04007592.1  | competence protein ComEC [Lactobacillus johnsonii ATCC 33200]                 | 760  | 7.00E-105 | 55.26 | 0.503 | 2333 | R  |
| LINAB1_0626 | thermostable pullulanase                                             | 623  |   | gi 58337968 ref YP_194553.1     | thermostable pullulanase [Lactobacillus acidophilus NCFM]                     | 1185 | 0         | 55.22 | 0.526 | 1523 | G  |
| LINAB1_1109 | alpha-glycerophosphate oxidase                                       | 320  | * | gi 148991959 ref ZP_01821733.1  | alpha-glycerophosphate oxidase [Streptococcus pneumoniae SP9-BS68]            | 608  | 2.00E-135 | 75.62 | 0.526 | 578  | C  |
| LINAB1_1149 | Transposase                                                          | 140  | * | gi 220927666 ref YP_002504575.1 | Integrase catalytic region [Clostridium cellulolyticum H10]                   | 266  | 7.00E-43  | 67.19 | 0.526 | 2801 | L  |
| LINAB1_1180 | possible 5'-nucleotidase                                             | 143  |   | gi 227360014 ref ZP_03844285.1  | possible 5'-nucleotidase [Lactobacillus sakei subsp. carnosus DSM 15831]      | 270  | 2.00E-47  | 59.15 | 0.530 | 1011 | R  |
| LINAB1_0272 | Putative cell-surface protein containing YSIRK motif                 | 1559 |   | gi 227516270 ref ZP_03946319.1  | possible biofilm-associated protein [Atopobium vaginae DSM 15829]             | 2902 | 2.00E-35  | 33.88 | 0.537 | -    | -  |
| LINAB1_0850 | Resolvase domain-containing protein                                  | 170  |   | gi 167757916 ref ZP_02430043.1  | hypothetical protein CLOSCI_00247 [Clostridium scindens ATCC 35704]           | 308  | 6.00E-43  | 51.25 | 0.552 | 1961 | L  |
| LINAB1_0631 | thermostable pullulanase                                             | 662  |   | gi 58337968 ref YP_194553.1     | thermostable pullulanase [Lactobacillus acidophilus NCFM]                     | 1185 | 0         | 48.66 | 0.559 | 1523 | G  |
| LINAB1_0221 | type I restriction-modification system, subunit S                    | 234  |   | gi 229878271 ref ZP_04497771.1  | restriction endonuclease S subunit [Slackia heliotrinireducens DSM 20476]     | 416  | 8.00E-68  | 56.9  | 0.563 | 732  | V  |
| LINAB1_0512 | conserved hypothetical protein                                       | 97   |   | gi 58337168 ref YP_193753.1     | hypothetical protein LBA0863 [Lactobacillus acidophilus NCFM]                 | 171  | 5.00E-17  | 55.43 | 0.567 | -    | -  |
| LINAB1_0069 | amino acid transporter                                               | 263  |   | gi 116630337 ref YP_815602.1    | amino acid transporter [Lactobacillus gasseri ATCC 33323]                     | 462  | 9.00E-116 | 77.78 | 0.569 | 531  | E  |
| LINAB1_0711 | hypothetical protein                                                 | 352  |   | gi 227525759 ref ZP_03955808.1  | possible autolysin [Lactobacillus jensenii JV-V16]                            | 606  | 2.00E-23  | 31.52 | 0.581 | -    | -  |
| LINAB1_0243 | Cell wall-associated hydrolase                                       | 199  |   | gi 199597375 ref ZP_03210805.1  | Cell wall-associated hydrolase [Lactobacillus rhamnosus HN001]                | 332  | 3.00E-37  | 77.53 | 0.599 | -    | -  |
| LINAB1_0824 | putative toxin-antitoxin system DNA-damage-inducible protein J, RelB | 56   |   | gi 221194396 ref ZP_03567453.1  | putative DNA-damage-inducible protein J [Atopobium rimae ATCC 49626]          | 93   | 3.00E-13  | 69.23 | 0.602 | -    | -  |
| LINAB1_0057 | transposase protein                                                  | 255  |   | gi 227878933 ref ZP_03996836.1  | transposase protein [Lactobacillus crispatus JV-V01]                          | 411  | 2.00E-50  | 48.71 | 0.620 | -    | -  |
| LINAB1_0318 | nucleoside-triphosphatase                                            | 131  |   | gi 227888696 ref ZP_04006501.1  | nucleoside-triphosphatase [Lactobacillus johnsonii ATCC 33200]                | 207  | 2.00E-56  | 79.69 | 0.633 | 127  | F  |
| LINAB1_0182 | conserved hypothetical protein                                       | 42   |   | gi 223933185 ref ZP_03625176.1  | conserved hypothetical protein [Streptococcus suis 89/1591]                   | 66   | 4.00E-12  | 85.37 | 0.636 | -    | -  |
| LINAB1_0798 | Putative fibrinogen-binding protein                                  | 777  |   | gi 227499830 ref ZP_03929923.1  | possible surface protein [Anaerococcus tetradius ATCC 35098]                  | 1214 | 6.00E-72  | 35.88 | 0.640 | -    | -  |
| LINAB1_0763 | hypothetical hemolytic protein                                       | 61   |   | gi 227526460 ref ZP_03956509.1  | alpha-hemolysin family protein [Lactobacillus jensenii JV-V16]                | 95   | 8.00E-21  | 77.05 | 0.642 | 759  | S  |
| LINAB1_0838 | transcriptional regulator                                            | 183  | * | gi 168494490 ref ZP_02718633.1  | transcriptional regulator [Streptococcus pneumoniae CDC3059-06]               | 284  | 2.00E-68  | 76.27 | 0.644 | -    | -  |
| LINAB1_0825 | toxin-antitoxin system DNA-damage-inducible protein J, RelB          | 66   | * | gi 227507093 ref ZP_03937142.1  | conserved hypothetical protein [Gardnerella vaginalis ATCC 14019]             | 101  | 1.00E-25  | 84.62 | 0.653 | 3077 | L  |
| LINAB1_0830 | conserved hypothetical protein                                       | 44   |   | gi 227516518 ref ZP_03946567.1  | transcriptional regulator [Atopobium vaginae DSM 15829]                       | 67   | 1.00E-16  | 95.45 | 0.657 | 1476 | K  |
| LINAB1_0118 | conserved hypothetical membrane spanning protein                     | 149  |   | gi 227485471 ref ZP_03915787.1  | hypothetical membrane spanning protein [Anaerococcus lactolyticus ATCC 51172] | 222  | 7.00E-20  | 39.2  | 0.671 | -    | -  |
| LINAB1_0674 | translation initiation factor IF-3                                   | 117  |   | gi 42519518 ref NP_965448.1     | translation initiation factor IF-3 [Lactobacillus johnsonii NCC 533]          | 172  | 1.00E-39  | 83.64 | 0.680 | 290  | J  |
| LINAB1_1001 | putative Zinc-dependent metalloproteinase                            | 120  |   | gi 194289064 ref YP_002004971.1 | putative Zinc-dependent metalloproteinase [Cupriavidus taiwanensis]           | 175  | 2.00E-18  | 43.48 | 0.686 | 2856 | E  |
| LINAB1_0953 | muramidase (lysozyme)                                                | 434  |   | gi 227521754 ref ZP_03951803.1  | muramidase [Lactobacillus gasseri JV-V03]                                     | 627  | 2.00E-72  | 58.96 | 0.692 | 1705 | NU |
| LINAB1_0472 | FAD synthase                                                         | 216  |   | gi 116629474 ref YP_814646.1    | FAD synthase [Lactobacillus gasseri ATCC 33323]                               | 312  | 1.00E-62  | 52.8  | 0.692 | 196  | H  |
| LINAB1_1139 | transcriptional regulator                                            | 197  |   | gi 227525202 ref ZP_03955251.1  | transcriptional regulator [Lactobacillus jensenii JV-V16]                     | 282  | 6.00E-41  | 41.46 | 0.699 | -    | -  |
| LINAB1_1003 | phage integrase family protein                                       | 191  |   | gi 42518322 ref NP_964252.1     | hypothetical protein LJ0236 [Lactobacillus johnsonii NCC 533]                 | 273  | 1.00E-80  | 79.47 | 0.700 | 4974 | L  |
| LINAB1_0787 | phosphomannose isomerase                                             | 229  |   | gi 116629895 ref YP_815067.1    | phosphomannose isomerase [Lactobacillus gasseri ATCC 33323]                   | 321  | 2.00E-91  | 68.42 | 0.713 | 1482 | G  |
| LINAB1_0755 | cysteine desulfurase                                                 | 278  |   | gi 227520661 ref ZP_03950710.1  | cysteine desulfurase [Lactobacillus gasseri JV-V03]                           | 384  | 3.00E-111 | 74.28 | 0.724 | 1104 | E  |
| LINAB1_1164 | ABC transporter permease component                                   | 158  |   | gi 42518158 ref NP_964088.1     | ABC transporter permease component [Lactobacillus johnsonii NCC               | 217  | 3.00E-54  | 55.28 | 0.728 | 619  | P  |

|             |                                                                               |     |   |                                 |                                                                                                           |     |           |       |       |      |     |
|-------------|-------------------------------------------------------------------------------|-----|---|---------------------------------|-----------------------------------------------------------------------------------------------------------|-----|-----------|-------|-------|------|-----|
| LINAB1_0577 | putative primosome component related protein                                  | 158 |   | gi 116629668 ref YP_814840.1    | 533]<br>putative primosome component related protein [Lactobacillus gasseri ATCC 33323]                   | 214 | 1.00E-51  | 61.01 | 0.738 | 3935 | L   |
| LINAB1_0990 | conserved hypothetical protein                                                | 82  | * | gi 227500141 ref ZP_03930211.1  | conserved hypothetical protein [Anaerococcus tetradius ATCC 35098]                                        | 110 | 9.00E-29  | 93.9  | 0.745 | 4938 | S   |
| LINAB1_0524 | LSU ribosomal protein L32p                                                    | 47  |   | gi 42519001 ref NP_964931.1     | 50S ribosomal protein L32 [Lactobacillus johnsonii NCC 533]                                               | 63  | 3.00E-18  | 93.62 | 0.746 | 333  | J   |
| LINAB1_0210 | conserved hypothetical protein                                                | 92  |   | gi 42518739 ref NP_964669.1     | hypothetical protein LJ0814 [Lactobacillus johnsonii NCC 533]                                             | 123 | 2.00E-35  | 73.91 | 0.748 | -    | -   |
| LINAB1_0951 | d-ala,d-ala ligase                                                            | 220 |   | gi 227522105 ref ZP_03952154.1  | d-ala,d-ala ligase [Lactobacillus gasseri JV-V03]                                                         | 290 | 2.00E-52  | 47.17 | 0.759 | -    | -   |
| LINAB1_1069 | SSU ribosomal protein S17p (S11e)                                             | 67  |   | gi 42518438 ref NP_964368.1     | 30S ribosomal protein S17 [Lactobacillus johnsonii NCC 533]                                               | 88  | 6.00E-20  | 94.03 | 0.761 | 186  | J   |
| LINAB1_0598 | putative transcriptional regulator                                            | 93  |   | gi 227521061 ref ZP_03951110.1  | possible transcriptional regulator [Lactobacillus gasseri JV-V03]                                         | 122 | 1.00E-16  | 48.24 | 0.762 | 1725 | K   |
| LINAB1_0803 | conserved hypothetical protein (DUF1814)                                      | 214 | * | gi 228003637 ref ZP_04050625.1  | protein of unknown function (DUF1814) [Anaerococcus prevotii DSM 20548]                                   | 278 | 3.00E-78  | 84.83 | 0.770 | -    | -   |
| LINAB1_0408 | ABC superfamily oligopeptide transport ATP-binding protein oppD               | 261 |   | gi 227526056 ref ZP_03956105.1  | oligopeptide ABC superfamily ATP binding cassette transporter ABC protein [Lactobacillus jensenii JV-V16] | 338 | 1.00E-128 | 89.26 | 0.772 | 444  | EP  |
| LINAB1_0572 | cell division initiation protein                                              | 113 |   | gi 227520954 ref ZP_03951003.1  | cell division initiation protein [Lactobacillus gasseri JV-V03]                                           | 145 | 5.00E-23  | 48.59 | 0.779 | 3599 | D   |
| LINAB1_0151 | hypothetical protein                                                          | 62  |   | gi 227362953 ref ZP_03847100.1  | hypothetical protein HMPREF0543_4180 [Lactobacillus sakei subsp. carnosus DSM 15831]                      | 78  | 2.00E-14  | 67.74 | 0.795 | 1724 | N   |
| LINAB1_0956 | conserved hypothetical protein                                                | 111 |   | gi 227521758 ref ZP_03951807.1  | conserved hypothetical protein [Lactobacillus gasseri JV-V03]                                             | 139 | 7.00E-38  | 61.26 | 0.799 | -    | -   |
| LINAB1_0982 | DEAD box ATP-dependent RNA helicase SrmB                                      | 388 |   | gi 227888879 ref ZP_04006684.1  | DEAD box ATP-dependent RNA helicase SrmB [Lactobacillus johnsonii ATCC 33200]                             | 484 | 0         | 79.38 | 0.802 | 513  | LKJ |
| LINAB1_0415 | signal recognition particle docking protein FtsY                              | 345 |   | gi 227361857 ref ZP_03846062.1  | signal recognition particle docking protein FtsY [Lactobacillus sakei subsp. carnosus DSM 15831]          | 430 | 1.00E-103 | 72.79 | 0.802 | 552  | U   |
| LINAB1_0305 | preprotein translocase subunit YajC                                           | 121 |   | gi 227521493 ref ZP_03951542.1  | preprotein translocase subunit YajC [Lactobacillus gasseri JV-V03]                                        | 150 | 1.00E-30  | 61.95 | 0.807 | 1862 | U   |
| LINAB1_0498 | possible rRNA (guanine-N(2)-)-methyltransferase                               | 147 |   | gi 227889783 ref ZP_04007588.1  | possible rRNA (guanine-N(2)-)-methyltransferase [Lactobacillus johnsonii ATCC 33200]                      | 182 | 2.00E-53  | 67.81 | 0.808 | 742  | L   |
| LINAB1_1167 | beta-lactamase superfamily I metal-dependent hydrolase                        | 215 |   | gi 227521856 ref ZP_03951905.1  | beta-lactamase superfamily I metal-dependent hydrolase [Lactobacillus gasseri JV-V03]                     | 265 | 9.00E-85  | 68.84 | 0.811 | 1235 | R   |
| LINAB1_1040 | CDF family cation diffusion facilitator                                       | 244 |   | gi 227360777 ref ZP_03845025.1  | CDF family cation diffusion facilitator [Lactobacillus sakei subsp. carnosus DSM 15831]                   | 299 | 5.00E-69  | 61.14 | 0.816 | 1230 | P   |
| LINAB1_0585 | phosphomevalonate kinase                                                      | 311 |   | gi 116629676 ref YP_814848.1    | phosphomevalonate kinase [Lactobacillus gasseri ATCC 33323]                                               | 380 | 5.00E-115 | 68.39 | 0.818 | 1577 | I   |
| LINAB1_0634 | major facilitator superfamily permease                                        | 382 |   | gi 227516468 ref ZP_03946517.1  | major facilitator superfamily permease [Atopobium vaginae DSM 15829]                                      | 466 | 3.00E-123 | 60.91 | 0.820 | 2814 | G   |
| LINAB1_0130 | conserved hypothetical protein                                                | 280 |   | gi 227522249 ref ZP_03952298.1  | conserved hypothetical protein [Lactobacillus gasseri JV-V03]                                             | 341 | 6.00E-38  | 38.31 | 0.821 | -    | -   |
| LINAB1_0995 | conserved hypothetical protein                                                | 626 | * | gi 227485418 ref ZP_03915734.1  | conserved hypothetical protein [Anaerococcus lactolyticus ATCC 51172]                                     | 757 | 0         | 84.95 | 0.827 | -    | -   |
| LINAB1_1189 | ribonuclease P protein component                                              | 101 |   | gi 42519905 ref NP_965835.1     | ribonuclease P [Lactobacillus johnsonii NCC 533]                                                          | 122 | 2.00E-27  | 61    | 0.828 | 594  | J   |
| LINAB1_0886 | putative aggregation promoting protein                                        | 186 |   | gi 227876979 ref ZP_03995072.1  | peptidoglycan-binding protein [Lactobacillus crispatus JV-V01]                                            | 223 | 7.00E-37  | 40.89 | 0.834 | -    | -   |
| LINAB1_1141 | conserved hypothetical protein                                                | 234 |   | gi 116628783 ref YP_813955.1    | hypothetical protein LGAS_0105 [Lactobacillus gasseri ATCC 33323]                                         | 279 | 3.00E-36  | 45.34 | 0.839 | -    | -   |
| LINAB1_0998 | conserved hypothetical protein                                                | 110 |   | gi 227485397 ref ZP_03915713.1  | conserved hypothetical protein [Anaerococcus lactolyticus ATCC 51172]                                     | 131 | 1.00E-28  | 58.18 | 0.840 | -    | -   |
| LINAB1_0241 | oligoendopeptidase F                                                          | 504 |   | gi 161508023 ref YP_001577990.1 | endopeptidase F [Lactobacillus helveticus DPC 4571]                                                       | 598 | 0         | 76.34 | 0.843 | 1164 | E   |
| LINAB1_1000 | conserved hypothetical protein                                                | 190 |   | gi 225550631 ref ZP_03771580.1  | conserved hypothetical protein [Ureaplasma urealyticum serovar 2 str. ATCC 27814]                         | 225 | 8.00E-34  | 42.31 | 0.844 | -    | -   |
| LINAB1_1150 | ribonuclease HI                                                               | 216 |   | gi 227525285 ref ZP_03955334.1  | ribonuclease [Lactobacillus jensenii JV-V16]                                                              | 255 | 3.00E-52  | 45.49 | 0.847 | 328  | L   |
| LINAB1_0728 | SUN protein                                                                   | 372 |   | gi 42519411 ref NP_965341.1     | SUN protein [Lactobacillus johnsonii NCC 533]                                                             | 438 | 1.00E-129 | 62.03 | 0.849 | 144  | J   |
| LINAB1_0058 | PTS system, mannose/fructose/N-acetylgalactosamine-specific IIA/IIB component | 282 |   | gi 116630348 ref YP_815624.1    | phosphotransferase system, mannose/fructose-specific component IIA [Lactobacillus gasseri ATCC 33323]     | 332 | 6.00E-134 | 81.05 | 0.849 | 3444 | G   |
| LINAB1_0133 | Acetyltransferase, including N-acetylase of ribosomal protein                 | 165 |   | gi 227889409 ref ZP_04007214.1  | possible acetyltransferase [Lactobacillus johnsonii ATCC 33200]                                           | 193 | 4.00E-36  | 47.27 | 0.855 | 1670 | J   |

|             |                                                                                       |     |   |                                 |                                                                                                                         |     |           |       |       |      |   |
|-------------|---------------------------------------------------------------------------------------|-----|---|---------------------------------|-------------------------------------------------------------------------------------------------------------------------|-----|-----------|-------|-------|------|---|
| LINAB1_0913 | thioredoxin reductase                                                                 | 267 |   | gi 42518777 ref NP_964707.1     | thioredoxin reductase [Lactobacillus johnsonii NCC 533]                                                                 | 311 | 3.00E-104 | 67.92 | 0.859 | 492  | O |
| LINAB1_0217 | type I restriction-modification system DNA methyltransferase, subunit M               | 432 | * | gi 169825074 ref YP_001692685.1 | type I restriction-modification system DNA methylase [Finegoldia magna ATCC 29328]                                      | 502 | 0         | 84.95 | 0.861 | 286  | V |
| LINAB1_0345 | uracil-DNA glycosylase                                                                | 231 |   | gi 116629926 ref YP_815098.1    | uracil-DNA glycosylase [Lactobacillus gasseri ATCC 33323]                                                               | 268 | 1.00E-104 | 77.92 | 0.862 | 692  | L |
| LINAB1_0156 | phage head morphogenesis protein                                                      | 294 |   | gi 227520598 ref ZP_03950647.1  | SPP1 gp7 family phage head morphogenesis protein [Lactobacillus gasseri JV-V03]                                         | 341 | 9.00E-64  | 46.24 | 0.862 | -    | - |
| LINAB1_0829 | conserved hypothetical protein                                                        | 144 | * | gi 227507099 ref ZP_03937148.1  | hypothetical protein HMPREF0421_0692 [Gardnerella vaginalis ATCC 14019]                                                 | 167 | 1.00E-60  | 88.89 | 0.862 | -    | - |
| LINAB1_0136 | phosphoenolpyruvate-dependent sugar phosphotransferase system EIIBC, arbutin specific | 545 |   | gi 42519689 ref NP_965619.1     | phosphoenolpyruvate-dependent sugar phosphotransferase system EIIBC, arbutin specific [Lactobacillus johnsonii NCC 533] | 628 | 0         | 91.01 | 0.868 | 1263 | G |
| LINAB1_0923 | hypothetical protein                                                                  | 192 |   | gi 116629963 ref YP_815135.1    | hypothetical protein LGAS_1335 [Lactobacillus gasseri ATCC 33323]                                                       | 221 | 1.00E-65  | 61.98 | 0.869 | 1739 | S |
| LINAB1_0727 | phosphoprotein phosphatase                                                            | 218 |   | gi 227521178 ref ZP_03951227.1  | phosphoprotein phosphatase [Lactobacillus gasseri JV-V03]                                                               | 250 | 8.00E-90  | 73.27 | 0.872 | 631  | T |
| LINAB1_0311 | conserved hypothetical protein                                                        | 90  |   | gi 227521487 ref ZP_03951536.1  | protein of hypothetical function DUF965 [Lactobacillus gasseri JV-V03]                                                  | 103 | 1.00E-41  | 97.65 | 0.874 | 4472 | S |
| LINAB1_0116 | cell wall-associated hydrolase                                                        | 229 |   | gi 58338000 ref YP_194585.1     | cell wall-associated hydrolase [Lactobacillus acidophilus NCFM]                                                         | 262 | 2.00E-54  | 44.75 | 0.874 | 791  | M |
| LINAB1_0008 | single-stranded DNA-binding protein                                                   | 151 |   | gi 227889150 ref ZP_04006955.1  | single-stranded DNA-binding protein [Lactobacillus johnsonii ATCC 33200]                                                | 172 | 5.00E-53  | 67.44 | 0.878 | 629  | L |
| LINAB1_0926 | recombination protein A                                                               | 319 |   | gi 227889603 ref ZP_04007408.1  | recombination protein A [Lactobacillus johnsonii ATCC 33200]                                                            | 363 | 4.00E-153 | 88.89 | 0.879 | 468  | L |
| LINAB1_0049 | D-alanyl transfer protein                                                             | 358 |   | gi 116630358 ref YP_815642.1    | D-alanyl transfer protein [Lactobacillus gasseri ATCC 33323]                                                            | 407 | 8.00E-163 | 81.79 | 0.880 | 1696 | M |
| LINAB1_0525 | conserved hypothetical protein                                                        | 68  |   | gi 227889856 ref ZP_04007661.1  | conserved hypothetical protein [Lactobacillus johnsonii ATCC 33200]                                                     | 77  | 4.00E-13  | 54.55 | 0.883 | -    | - |
| LINAB1_0942 | dithiol-disulfide isomerase                                                           | 205 |   | gi 227889584 ref ZP_04007389.1  | dithiol-disulfide isomerase [Lactobacillus johnsonii ATCC 33200]                                                        | 232 | 7.00E-36  | 41.71 | 0.884 | -    | - |
| LINAB1_0694 | UDP-N-acetylglucosamine 2-epimerase                                                   | 384 |   | gi 116629355 ref YP_814527.1    | UDP-N-acetylglucosamine 2-epimerase [Lactobacillus gasseri ATCC 33323]                                                  | 432 | 0         | 83.81 | 0.889 | 381  | M |
| LINAB1_0430 | 50S ribosomal protein L21                                                             | 139 |   | gi 116629402 ref YP_814574.1    | ribosomal protein L21 [Lactobacillus gasseri ATCC 33323]                                                                | 156 | 5.00E-34  | 77.78 | 0.891 | 261  | J |
| LINAB1_0466 | transcription elongation factor NusA                                                  | 362 |   | gi 226820417 ref ZP_03809536.1  | transcription elongation factor NusA [Lactobacillus gasseri MV-22]                                                      | 406 | 1.00E-155 | 84.53 | 0.892 | 195  | K |
| LINAB1_0863 | Asp-tRNAAsn/Glu-tRNA <sup>Gln</sup> amidotransferase C subunit                        | 100 |   | gi 116630134 ref YP_815306.1    | Asp-tRNAAsn/Glu-tRNA <sup>Gln</sup> amidotransferase C subunit [Lactobacillus gasseri ATCC 33323]                       | 112 | 1.00E-38  | 80.81 | 0.893 | 721  | J |
| LINAB1_0989 | conserved hypothetical protein                                                        | 67  | * | gi 227500142 ref ZP_03930212.1  | conserved hypothetical protein [Anaerococcus tetradius ATCC 35098]                                                      | 75  | 3.00E-28  | 93.94 | 0.893 | 3655 | K |
| LINAB1_0894 | Zinc ABC transporter, periplasmic-binding protein ZnuA                                | 303 | * | gi 160947326 ref ZP_02094493.1  | hypothetical protein PEPMIC_01260 [Peptostreptococcus micros ATCC 33270]                                                | 338 | 1.00E-119 | 68.11 | 0.896 | 803  | P |
| LINAB1_1018 | xanthine phosphoribosyltransferase                                                    | 192 |   | gi 227528033 ref ZP_03958082.1  | xanthine phosphoribosyltransferase [Lactobacillus ruminis ATCC 25644]                                                   | 214 | 2.00E-71  | 66.67 | 0.897 | 503  | F |

**Table S3. Predicted foreign genes of *L. iners* AB-1 acquired by horizontal gene transfer (HGT)**

| Gene ID     | Annotation                                                              | Best hit to NCBI nrdb           | % ID  | e-val     | Best hit Annotation                                                | Species                              | COG number | COG Class |
|-------------|-------------------------------------------------------------------------|---------------------------------|-------|-----------|--------------------------------------------------------------------|--------------------------------------|------------|-----------|
| LINAB1_0159 | phage protein                                                           | gi 77414311 ref ZP_00790468.1   | 62.11 | 3.00E-28  | hypothetical protein SAL_0616                                      | Streptococcus agalactiae 515         | -          | -         |
| LINAB1_0216 | Putative cholesterol-dependent cytolysin                                | gi 187940703 gb ACD39461.1      | 55.14 | 4.00E-149 | vaginolysin                                                        | Gardnerella vaginalis                | -          | -         |
| LINAB1_0217 | type I restriction-modification system DNA methyltransferase, subunit M | gi 169825074 ref YP_001692685.1 | 84.95 | 0         | type I restriction-modification system DNA methylase               | Fingoldia magna ATCC 29328           | 286        | V         |
| LINAB1_0219 | putative integrase                                                      | gi 169825072 ref YP_001692683.1 | 86.07 | 3.00E-57  | putative integrase                                                 | Fingoldia magna ATCC 29328           | 4974       | L         |
| LINAB1_0220 | type I restriction-modification system, subunit S                       | gi 164688285 ref ZP_02212313.1  | 60    | 4.00E-55  | hypothetical protein CLOBAR_01930                                  | Clostridium bartlettii DSM 16795     | 732        | V         |
| LINAB1_0222 | type I restriction-modification system, restriction subunit R           | gi 169825069 ref YP_001692680.1 | 79.65 | 0         | type I restriction-modification system restriction subunit         | Fingoldia magna ATCC 29328           | 610        | V         |
| LINAB1_0229 | PTS system, lactose-specific IIA component                              | gi 15675727 ref NP_269901.1     | 71.84 | 6.00E-37  | PTS system, lactose-specific IIA component                         | Streptococcus pyogenes M1 GAS        | 1447       | G         |
| LINAB1_0230 | PTS system, lactose-specific IIB/IIC component                          | gi 222152959 ref YP_002562136.1 | 82.77 | 0         | lactose-specific phosphotransferase system (PTS), IIBC component 2 | Streptococcus uberis 0140J           | 1455       | G         |
| LINAB1_0231 | 6-phospho-beta-galactosidase                                            | gi 24379883 ref NP_721838.1     | 83.73 | 0         | 6-phospho-beta-galactosidase                                       | Streptococcus mutans UA159           | 2723       | G         |
| LINAB1_0274 | hypothetical nicotinate-nucleotide pyrophosphorylase (carboxylating)    | gi 210616336 ref ZP_03291041.1  | 62.96 | 1.00E-20  | hypothetical protein CLONEX_03262                                  | Clostridium nexile DSM 1787          | 157        | H         |
| LINAB1_0275 | type I site-specific deoxyribonuclease                                  | gi 221076936 ref ZP_03548214.1  | 78.4  | 0         | hypothetical protein BLAHAN_02002                                  | Blautia hansenii DSM 20583           | 610        | V         |
| LINAB1_0276 | hypothetical protein                                                    | gi 210623096 ref ZP_03293583.1  | 81.69 | 6.00E-25  | hypothetical protein CLOHIR_01533                                  | Clostridium hiranonis DSM 13275      | -          | -         |
| LINAB1_0277 | hypothetical protein                                                    | gi 221076936 ref ZP_03548214.1  | 73.24 | 3.00E-23  | hypothetical protein BLAHAN_02002                                  | Blautia hansenii DSM 20583           | -          | -         |
| LINAB1_0592 | toxin-antitoxin system DNA-damage-inducible protein J, RelB             | gi 227873638 ref ZP_03991875.1  | 68.97 | 4.00E-28  | DNA-damage-inducible protein J                                     | Oribacterium sinus F0268             | 3077       | L         |
| LINAB1_0593 | Putative predicted metal-dependent hydrolase                            | gi 150391747 ref YP_001321796.1 | 62.71 | 9.00E-90  | hypothetical protein Amet_4055                                     | Alkaliphilus metalliredigens QYMF    | 1451       | R         |
| LINAB1_0594 | toxin-antitoxin system DNA-damage-inducible protein J, RelB             | gi 227873638 ref ZP_03991875.1  | 66.67 | 3.00E-27  | DNA-damage-inducible protein J                                     | Oribacterium sinus F0268             | 3077       | L         |
| LINAB1_0595 | methionine sulfoxide reductase A                                        | gi 227486043 ref ZP_03916359.1  | 80.87 | 1.00E-132 | methionine sulfoxide reductase A                                   | Anaerococcus lactolyticus ATCC 51172 | -          | -         |
| LINAB1_0614 | putative oxidoreductase                                                 | gi 227516147 ref ZP_03946196.1  | 66.31 | 5.00E-64  | possible NAD(P)H dehydrogenase (quinone)                           | Atopobium vaginae DSM 15829          | 431        | R         |
| LINAB1_0790 | ABC superfamily ATP binding cassette transporter, ABC protein           | gi 228002662 ref ZP_04049656.1  | 66.8  | 2.00E-101 | ABC-type antimicrobial peptide transport system, ATPase component  | Anaerococcus prevotii DSM 20548      | 1136       | V         |
| LINAB1_0792 | response regulator                                                      | gi 227873881 ref ZP_03992103.1  | 60.18 | 1.00E-61  | response regulator                                                 | Oribacterium sinus F0268             | 745        | TK        |
| LINAB1_0799 | DNA binding helix-turn helix protein                                    | gi 212697019 ref ZP_03305147.1  | 84.13 | 1.00E-22  | hypothetical protein ANHYDRO_01584                                 | Anaerococcus hydrogenalis DSM 7454   | 1476       | K         |
| LINAB1_0802 | conserved hypothetical protein                                          | gi 227493773 ref ZP_03924089.1  | 67    | 2.00E-77  | hypothetical protein HMPREF0573_1671                               | Mobiluncus curtisii ATCC 43063       | -          | -         |
| LINAB1_0803 | conserved hypothetical protein (DUF1814)                                | gi 228003637 ref ZP_04050625.1  | 84.83 | 3.00E-78  | protein of unknown function (DUF1814)                              | Anaerococcus prevotii DSM 20548      | -          | -         |
| LINAB1_0804 | possible transcriptional regulator                                      | gi 227486796 ref ZP_03917112.1  | 91.28 | 2.00E-89  | possible transcriptional regulator                                 | Anaerococcus lactolyticus ATCC 51172 | 5340       | K         |
| LINAB1_0805 | alpha-ribazole-5-phosphate phosphatase                                  | gi 227500905 ref ZP_03930954.1  | 74.72 | 2.00E-73  | phosphoglycerate mutase                                            | Anaerococcus tetradius ATCC 35098    | 406        | G         |
| LINAB1_0806 | possible acetyltransferase                                              | gi 227507094 ref ZP_03937143.1  | 88.69 | 2.00E-84  | possible acetyltransferase                                         | Gardnerella vaginalis ATCC 14019     | 3981       | R         |
| LINAB1_0818 | conserved hypothetical protein                                          | gi 227516504 ref ZP_03946553.1  | 81.54 | 6.00E-23  | hypothetical protein HMPREF0091_0759                               | Atopobium vaginae DSM 15829          | -          | -         |
| LINAB1_0820 | possible acyl-CoA thioesterase                                          | gi 227500902 ref ZP_03930951.1  | 82.05 | 3.00E-50  | acyl-CoA thioesterase                                              | Anaerococcus tetradius ATCC 35098    | -          | -         |
| LINAB1_0821 | Plasmid stabilization protein                                           | gi 227516519 ref ZP_03946568.1  | 85.98 | 3.00E-47  | conserved hypothetical protein                                     | Atopobium vaginae DSM 15829          | -          | -         |
| LINAB1_0822 | toxin-antitoxin system DNA-damage-inducible protein J, RelB             | gi 227507077 ref ZP_03937126.1  | 96    | 3.00E-50  | conserved hypothetical protein                                     | Gardnerella vaginalis ATCC 14019     | 3077       | L         |
| LINAB1_0823 | ABC superfamily ATP binding cassette transporter, ABC protein           | gi 227507072 ref ZP_03937121.1  | 92.07 | 0         | ABC superfamily ATP binding cassette transporter, ABC protein      | Gardnerella vaginalis ATCC 14019     | 488        | R         |
| LINAB1_0825 | toxin-antitoxin system DNA-damage-inducible protein J, RelB             | gi 227507093 ref ZP_03937142.1  | 84.62 | 1.00E-25  | conserved hypothetical protein                                     | Gardnerella vaginalis ATCC 14019     | 3077       | L         |
| LINAB1_0826 | conserved hypothetical protein                                          | gi 227507092 ref ZP_03937141.1  | 75.7  | 3.00E-43  | conserved hypothetical protein                                     | Gardnerella vaginalis ATCC 14019     | -          | -         |
| LINAB1_0827 | conserved hypothetical protein with DNA binding helix-turn helix domain | gi 227507085 ref ZP_03937134.1  | 96.19 | 4.00E-106 | conserved hypothetical protein                                     | Gardnerella vaginalis ATCC 14019     | 1396       | K         |
| LINAB1_0828 | Cadmium resistance protein                                              | gi 227507831 ref ZP_03937880.1  | 98.52 | 1.00E-87  | possible cadmium binding protein                                   | Gardnerella vaginalis ATCC 14019     | 4300       | P         |

|             |                                                                            |                                 |       |           |                                                                    |                                        |      |    |
|-------------|----------------------------------------------------------------------------|---------------------------------|-------|-----------|--------------------------------------------------------------------|----------------------------------------|------|----|
| LINAB1_0829 | conserved hypothetical protein                                             | gi 227507099 ref ZP_03937148.1  | 88.89 | 1.00E-60  | hypothetical protein HMPREF0421_0692                               | Gardnerella vaginalis ATCC 14019       | -    | -  |
| LINAB1_0832 | conserved hypothetical protein                                             | gi 228003721 ref ZP_04050708.1  | 96.61 | 3.00E-86  | hypothetical protein ApreDRAFT_14780                               | Anaerococcus prevotii DSM 20548        | -    | -  |
| LINAB1_0834 | NUDIX family hydrolase                                                     | gi 227507082 ref ZP_03937131.1  | 92.5  | 2.00E-83  | nudix family hydrolase                                             | Gardnerella vaginalis ATCC 14019       | 1051 | F  |
| LINAB1_0835 | hypothetical protein                                                       | gi 227486554 ref ZP_03916870.1  | 77.33 | 8.00E-25  | conserved hypothetical protein                                     | Anaerococcus lactolyticus ATCC 51172   | -    | -  |
| LINAB1_0838 | transcriptional regulator                                                  | gi 168494490 ref ZP_02718633.1  | 76.27 | 2.00E-68  | transcriptional regulator                                          | Streptococcus pneumoniae CDC3059-06    | -    | -  |
| LINAB1_0841 | conserved hypothetical protein                                             | gi 126699471 ref YP_001088368.1 | 92.99 | 4.00E-81  | hypothetical protein CD1860                                        | Clostridium difficile 630              | 4804 | S  |
| LINAB1_0844 | phage portal family protein                                                | gi 167746044 ref ZP_02418171.1  | 74.26 | 2.00E-37  | hypothetical protein ANACAC_00739                                  | Anaerostipes caccae DSM 14662          | 4695 | S  |
| LINAB1_0847 | Phage terminase-like protein, large subunit                                | gi 57234156 ref YP_181803.1     | 84.11 | 1.00E-46  | terminase, large subunit, putative                                 | Dehalococcoides ethenogenes 195        | 4626 | R  |
| LINAB1_0848 | conserved hypothetical protein                                             | gi 213031123 emb CAR31460.1     | 82.71 | 6.00E-103 | hypothetical protein                                               | Streptococcus pneumoniae               | -    | -  |
| LINAB1_0849 | putative recombinase                                                       | gi 229828216 ref ZP_04454285.1  | 63.64 | 7.00E-34  | hypothetical protein GCWU000342_00273                              | Shuttleworthia satelles DSM 14600      | -    | -  |
| LINAB1_0851 | NUDIX family hydrolase                                                     | gi 154484819 ref ZP_02027267.1  | 60.74 | 1.00E-55  | hypothetical protein EUBVEN_02537                                  | Eubacterium ventriosum ATCC 27560      | 494  | LR |
| LINAB1_0853 | conserved hypothetical protein                                             | gi 225388653 ref ZP_03758377.1  | 76.41 | 0         | hypothetical protein CLOSTASPAR_02389                              | Clostridium asparagiforme DSM 15981    | -    | -  |
| LINAB1_0892 | putative zinc ABC transporter permease protein                             | gi 227901992 ref ZP_04019797.1  | 73    | 3.00E-88  | ABC superfamily ATP binding cassette transporter, membrane protein | Fingoldia magna ATCC 53516             | 1108 | P  |
| LINAB1_0893 | putative zinc ABC transporter ATP-binding protein                          | gi 227486040 ref ZP_03916356.1  | 55.96 | 9.00E-59  | ABC superfamily ATP binding cassette transporter, ABC protein      | Anaerococcus lactolyticus ATCC 51172   | 1121 | P  |
| LINAB1_0894 | Zinc ABC transporter, periplasmic-binding protein ZnuA                     | gi 160947326 ref ZP_02094493.1  | 68.11 | 1.00E-119 | hypothetical protein PEPMIC_01260                                  | Peptostreptococcus micros ATCC 33270   | 803  | P  |
| LINAB1_0987 | DNA-methyltransferase Dcm                                                  | gi 229859874 ref ZP_04479531.1  | 71.95 | 1.00E-144 | DNA-methyltransferase Dcm                                          | Streptobacillus moniliformis DSM 12112 | 270  | L  |
| LINAB1_0988 | conserved hypothetical protein                                             | gi 228003647 ref ZP_04050634.1  | 76.04 | 3.00E-32  | hypothetical protein ApreDRAFT_14040                               | Anaerococcus prevotii DSM 20548        | -    | -  |
| LINAB1_0989 | conserved hypothetical protein                                             | gi 227500142 ref ZP_03930212.1  | 93.94 | 3.00E-28  | conserved hypothetical protein                                     | Anaerococcus tetradius ATCC 35098      | 3655 | K  |
| LINAB1_0990 | conserved hypothetical protein                                             | gi 227500141 ref ZP_03930211.1  | 93.9  | 9.00E-29  | conserved hypothetical protein                                     | Anaerococcus tetradius ATCC 35098      | 4938 | S  |
| LINAB1_0992 | copper-exporting ATPase                                                    | gi 227500140 ref ZP_03930210.1  | 95.12 | 0         | copper-exporting ATPase                                            | Anaerococcus tetradius ATCC 35098      | 2217 | P  |
| LINAB1_0993 | transcriptional repressor CopY                                             | gi 227500139 ref ZP_03930209.1  | 95.3  | 1.00E-78  | penicillinase repressor                                            | Anaerococcus tetradius ATCC 35098      | 3682 | K  |
| LINAB1_0994 | conserved hypothetical protein                                             | gi 169824640 ref YP_001692251.1 | 89.53 | 4.00E-36  | hypothetical protein FMG_0943                                      | Fingoldia magna ATCC 29328             | -    | -  |
| LINAB1_0995 | conserved hypothetical protein                                             | gi 227485418 ref ZP_03915734.1  | 84.95 | 0         | conserved hypothetical protein                                     | Anaerococcus lactolyticus ATCC 51172   | -    | -  |
| LINAB1_0997 | conserved hypothetical protein                                             | gi 227485396 ref ZP_03915712.1  | 95.08 | 6.00E-24  | hypothetical protein HMPREF0072_0799                               | Anaerococcus lactolyticus ATCC 51172   | -    | -  |
| LINAB1_1108 | Alpha-glycerophosphate oxidase, putative                                   | gi 125718626 ref YP_001035759.1 | 60.56 | 1.00E-102 | Alpha-glycerophosphate oxidase, putative                           | Streptococcus sanguinis SK36           | 578  | C  |
| LINAB1_1109 | alpha-glycerophosphate oxidase                                             | gi 148991959 ref YP_01821733.1  | 75.62 | 2.00E-135 | alpha-glycerophosphate oxidase                                     | Streptococcus pneumoniae SP9-BS68      | 578  | C  |
| LINAB1_1110 | glycerol kinase                                                            | gi 146318376 ref YP_001198088.1 | 76.34 | 0         | glycerol kinase                                                    | Streptococcus suis 05ZYH33             | 554  | C  |
| LINAB1_1149 | Transposase                                                                | gi 220927666 ref YP_002504575.1 | 67.19 | 7.00E-43  | Integrase catalytic region                                         | Clostridium cellulolyticum H10         | 2801 | L  |
| LINAB1_1154 | ABC superfamily ATP binding cassette transporter, ABC protein possible MDR | gi 227507118 ref ZP_03937167.1  | 72.06 | 0         | ABC superfamily ATP binding cassette transporter, ABC protein      | Gardnerella vaginalis ATCC 14019       | 1132 | V  |
| LINAB1_1184 | Ribonucleotide reduction protein NrdI                                      | gi 77411315 ref ZP_00787664.1   | 66.67 | 3.00E-44  | nrdI protein                                                       | Streptococcus agalactiae CJB111        | 1780 | F  |

**Table S4. Predicted highly expressed genes of *L. iners* AB-1 based on an average codon adaptation index (CAI) of 0.7 or higher**

| Gene ID     | Annotation                                                                       | HGT | sm_cai | lg_cai | avg   |
|-------------|----------------------------------------------------------------------------------|-----|--------|--------|-------|
| LINAB1_1055 | LSU ribosomal protein L36                                                        |     | 0.866  | 0.882  | 0.874 |
| LINAB1_1020 | 50S ribosomal protein L7/L12                                                     |     | 0.825  | 0.841  | 0.833 |
| LINAB1_0504 | 30S ribosomal protein S20                                                        |     | 0.833  | 0.824  | 0.829 |
| LINAB1_0627 | phosphopyruvate hydratase                                                        |     | 0.825  | 0.829  | 0.827 |
| LINAB1_1046 | LSU ribosomal protein L13                                                        |     | 0.813  | 0.827  | 0.820 |
| LINAB1_0444 | 30S ribosomal protein S16                                                        |     | 0.811  | 0.808  | 0.810 |
| LINAB1_0103 | phosphoglycerate mutase                                                          |     | 0.805  | 0.813  | 0.809 |
| LINAB1_1072 | 30S ribosomal protein S3                                                         |     | 0.802  | 0.803  | 0.803 |
| LINAB1_0078 | Maltose/maltodextrin ABC transporter, substrate binding periplasmic protein MalE |     | 0.798  | 0.801  | 0.800 |
| LINAB1_0007 | 30S ribosomal protein S6                                                         |     | 0.799  | 0.798  | 0.799 |
| LINAB1_0899 | enolase                                                                          |     | 0.795  | 0.802  | 0.799 |
| LINAB1_0901 | phosphoglycerate kinase                                                          |     | 0.79   | 0.802  | 0.796 |
| LINAB1_0505 | 30S ribosomal protein S15P/S13E                                                  |     | 0.795  | 0.79   | 0.793 |
| LINAB1_0456 | 30S ribosomal protein S2                                                         |     | 0.782  | 0.802  | 0.792 |
| LINAB1_0509 | trigger factor                                                                   |     | 0.785  | 0.791  | 0.788 |
| LINAB1_1074 | 30S ribosomal protein S19                                                        |     | 0.783  | 0.792  | 0.788 |
| LINAB1_0121 | 30S ribosomal protein S7                                                         |     | 0.783  | 0.79   | 0.787 |
| LINAB1_1022 | 50S ribosomal protein L1                                                         |     | 0.775  | 0.798  | 0.787 |
| LINAB1_0524 | LSU ribosomal protein L32p                                                       |     | 0.792  | 0.78   | 0.786 |
| LINAB1_0900 | triosephosphate isomerase                                                        |     | 0.782  | 0.787  | 0.785 |
| LINAB1_0902 | glyceraldehyde 3-phosphate dehydrogenase                                         |     | 0.775  | 0.793  | 0.784 |
| LINAB1_0190 | fructose-bisphosphate aldolase class-II                                          |     | 0.775  | 0.788  | 0.782 |
| LINAB1_0984 | 50S ribosomal protein L31 type B                                                 |     | 0.781  | 0.782  | 0.782 |
| LINAB1_0120 | 30S ribosomal protein S12                                                        |     | 0.782  | 0.779  | 0.781 |
| LINAB1_0122 | elongation factor G (fusA)                                                       |     | 0.772  | 0.781  | 0.777 |
| LINAB1_1059 | ribosomal protein L15                                                            |     | 0.768  | 0.785  | 0.777 |
| LINAB1_0528 | pyruvate kinase                                                                  |     | 0.768  | 0.782  | 0.775 |
| LINAB1_0540 | DNA-binding protein HU                                                           |     | 0.776  | 0.773  | 0.775 |
| LINAB1_1157 | conserved hypothetical protein                                                   |     | 0.768  | 0.778  | 0.773 |
| LINAB1_0610 | YqeY domain-containing protein                                                   |     | 0.767  | 0.776  | 0.772 |
| LINAB1_0956 | conserved hypothetical protein                                                   |     | 0.763  | 0.781  | 0.772 |
| LINAB1_0672 | 50S ribosomal protein L20                                                        |     | 0.763  | 0.779  | 0.771 |
| LINAB1_0015 | hypothetical protein                                                             |     | 0.821  | 0.718  | 0.770 |
| LINAB1_0578 | asparaginyl-tRNA synthetase                                                      |     | 0.761  | 0.767  | 0.764 |
| LINAB1_0757 | 30S ribosomal protein S4                                                         |     | 0.763  | 0.762  | 0.763 |
| LINAB1_0451 | conserved hypothetical protein                                                   |     | 0.746  | 0.778  | 0.762 |
| LINAB1_0479 | molecular chaperone DnaK                                                         |     | 0.76   | 0.761  | 0.761 |
| LINAB1_0978 | L-lactate dehydrogenase                                                          |     | 0.752  | 0.769  | 0.761 |
| LINAB1_1065 | 30S ribosomal protein S14                                                        |     | 0.76   | 0.761  | 0.761 |



|             |                                                                                             |   |       |       |       |
|-------------|---------------------------------------------------------------------------------------------|---|-------|-------|-------|
| LINAB1_0199 | hit family protein                                                                          |   | 0.748 | 0.772 | 0.760 |
| LINAB1_0125 | elongation factor P                                                                         |   | 0.75  | 0.768 | 0.759 |
| LINAB1_1076 | 50S ribosomal protein L23                                                                   |   | 0.741 | 0.775 | 0.758 |
| LINAB1_0431 | 50S ribosomal protein L27                                                                   |   | 0.744 | 0.768 | 0.756 |
| LINAB1_0950 | Putative cell-surface protein containing YSIRK motif                                        |   | 0.752 | 0.759 | 0.756 |
| LINAB1_0886 | putative aggregation promoting protein                                                      |   | 0.741 | 0.768 | 0.755 |
| LINAB1_0235 | galactose-6-phosphate isomerase subunit LacB                                                |   | 0.735 | 0.753 | 0.744 |
| LINAB1_0341 | ABC-type sugar transport system, periplasmic component                                      |   | 0.741 | 0.742 | 0.742 |
| LINAB1_0668 | hypothetical protein                                                                        |   | 0.734 | 0.749 | 0.742 |
| LINAB1_1067 | LSU ribosomal protein L24p (L26e)                                                           |   | 0.73  | 0.753 | 0.742 |
| LINAB1_0517 | hypothetical protein                                                                        |   | 0.758 | 0.719 | 0.739 |
| LINAB1_0300 | chaperonin GroEL                                                                            |   | 0.732 | 0.744 | 0.738 |
| LINAB1_0060 | PTS system, mannose/fructose/N-acetylgalactosamine-specific IID component                   |   | 0.739 | 0.732 | 0.736 |
| LINAB1_1075 | 50S ribosomal protein L2                                                                    |   | 0.73  | 0.741 | 0.736 |
| LINAB1_0375 | hypothetical protein                                                                        |   | 0.737 | 0.732 | 0.735 |
| LINAB1_0412 | ABC superfamily oligopeptide ABC transporter, periplasmic oligopeptide-binding protein oppA |   | 0.734 | 0.736 | 0.735 |
| LINAB1_0310 | alanyl-tRNA synthetase                                                                      |   | 0.728 | 0.74  | 0.734 |
| LINAB1_1077 | 50S ribosomal protein L4                                                                    |   | 0.726 | 0.741 | 0.734 |
| LINAB1_0433 | elongation factor P                                                                         |   | 0.73  | 0.736 | 0.733 |
| LINAB1_0508 | translation elongation factor 1A (EF-1A/EF-Tu)                                              |   | 0.717 | 0.747 | 0.732 |
| LINAB1_1035 | aminopeptidase C                                                                            |   | 0.725 | 0.739 | 0.732 |
| LINAB1_0216 | inolysin                                                                                    | * | 0.724 | 0.737 | 0.731 |
| LINAB1_0135 | maltose-6'-phosphate glucosidase                                                            |   | 0.725 | 0.734 | 0.730 |
| LINAB1_0873 | glycosyltransferase                                                                         |   | 0.726 | 0.734 | 0.730 |
| LINAB1_0075 | maltose phosphorylase                                                                       |   | 0.723 | 0.732 | 0.728 |
| LINAB1_0116 | cell wall-associated hydrolase                                                              |   | 0.724 | 0.731 | 0.728 |
| LINAB1_0457 | elongation factor Ts                                                                        |   | 0.724 | 0.732 | 0.728 |
| LINAB1_1063 | 50S ribosomal protein L6                                                                    |   | 0.708 | 0.747 | 0.728 |
| LINAB1_0326 | conserved hypothetical protein                                                              |   | 0.719 | 0.734 | 0.727 |
| LINAB1_0662 | possible nucleic acid-binding protein                                                       |   | 0.726 | 0.727 | 0.727 |
| LINAB1_0032 | ABC superfamily ATP binding cassette transporter, binding protein                           |   | 0.72  | 0.731 | 0.726 |
| LINAB1_0561 | manganese-dependent inorganic pyrophosphatase                                               |   | 0.721 | 0.73  | 0.726 |
| LINAB1_0765 | hypothetical protein                                                                        |   | 0.758 | 0.694 | 0.726 |
| LINAB1_0334 | acetaldehyde dehydrogenase (acetylating)                                                    |   | 0.719 | 0.73  | 0.725 |
| LINAB1_0612 | hypothetical protein                                                                        |   | 0.73  | 0.72  | 0.725 |
| LINAB1_0614 | putative oxidoreductase                                                                     | * | 0.716 | 0.733 | 0.725 |
| LINAB1_0661 | DNA-binding response regulator                                                              |   | 0.715 | 0.734 | 0.725 |
| LINAB1_0949 | hypothetical protein                                                                        |   | 0.729 | 0.721 | 0.725 |
| LINAB1_0189 | arginyl-tRNA synthetase                                                                     |   | 0.725 | 0.723 | 0.724 |
| LINAB1_0305 | preprotein translocase subunit YajC                                                         |   | 0.724 | 0.723 | 0.724 |
| LINAB1_0313 | conserved hypothetical protein                                                              |   | 0.709 | 0.737 | 0.723 |
| LINAB1_0324 | M20 family peptidase PepV                                                                   |   | 0.714 | 0.731 | 0.723 |
| LINAB1_0193 | conserved hypothetical protein                                                              |   | 0.714 | 0.729 | 0.722 |

|             |                                                                                |   |       |       |       |
|-------------|--------------------------------------------------------------------------------|---|-------|-------|-------|
| LINAB1_0861 | aspartyl/glutamyl-tRNA amidotransferase subunit B                              |   | 0.716 | 0.728 | 0.722 |
| LINAB1_0065 | asparagine synthetase AsnA                                                     |   | 0.716 | 0.726 | 0.721 |
| LINAB1_0362 | hypothetical protein                                                           |   | 0.714 | 0.725 | 0.720 |
| LINAB1_0675 | threonyl-tRNA synthetase                                                       |   | 0.712 | 0.722 | 0.717 |
| LINAB1_0760 | universal stress protein UspA-like nucleotide-binding protein                  |   | 0.716 | 0.718 | 0.717 |
| LINAB1_0894 | Zinc ABC transporter, periplasmic-binding protein ZnuA                         | * | 0.715 | 0.719 | 0.717 |
| LINAB1_1053 | 30S ribosomal protein S11                                                      |   | 0.715 | 0.719 | 0.717 |
| LINAB1_0766 | F0F1 ATP synthase subunit epsilon                                              |   | 0.711 | 0.721 | 0.716 |
| LINAB1_0213 | Phosphocarrier protein of PTS system HPr                                       |   | 0.706 | 0.723 | 0.715 |
| LINAB1_1066 | 50S ribosomal protein L5                                                       |   | 0.71  | 0.719 | 0.715 |
| LINAB1_0198 | hypothetical protein                                                           |   | 0.707 | 0.721 | 0.714 |
| LINAB1_0635 | glutamate--ammonia ligase                                                      |   | 0.717 | 0.71  | 0.714 |
| LINAB1_1054 | 30S ribosomal protein S13                                                      |   | 0.704 | 0.724 | 0.714 |
| LINAB1_0783 | glucose-6-phosphate isomerase                                                  |   | 0.708 | 0.717 | 0.713 |
| LINAB1_0932 | conserved hypothetical protein                                                 |   | 0.7   | 0.725 | 0.713 |
| LINAB1_1061 | 30S ribosomal protein S5                                                       |   | 0.698 | 0.727 | 0.713 |
| LINAB1_0590 | signal peptidase I                                                             |   | 0.706 | 0.718 | 0.712 |
| LINAB1_1060 | 50S ribosomal protein L30                                                      |   | 0.723 | 0.7   | 0.712 |
| LINAB1_0527 | 6-phosphofructokinase                                                          |   | 0.705 | 0.717 | 0.711 |
| LINAB1_0669 | PTS family fructose porter components IIABC                                    |   | 0.713 | 0.706 | 0.710 |
| LINAB1_0279 | adenylosuccinate synthetase                                                    |   | 0.702 | 0.715 | 0.709 |
| LINAB1_0377 | hypothetical protein                                                           |   | 0.71  | 0.708 | 0.709 |
| LINAB1_0418 | isoleucyl-tRNA synthetase                                                      |   | 0.709 | 0.708 | 0.709 |
| LINAB1_0469 | translation initiation factor IF-2                                             |   | 0.704 | 0.714 | 0.709 |
| LINAB1_0793 | sugar ABC superfamily ATP binding cassette transporter, periplasmic component  |   | 0.717 | 0.7   | 0.709 |
| LINAB1_1071 | 50S ribosomal protein L16                                                      |   | 0.701 | 0.716 | 0.709 |
| LINAB1_1087 | methionyl-tRNA synthetase                                                      |   | 0.707 | 0.71  | 0.709 |
| LINAB1_1101 | bleomycin hydrolase                                                            |   | 0.703 | 0.715 | 0.709 |
| LINAB1_1102 | neutral endopeptidase                                                          |   | 0.701 | 0.714 | 0.708 |
| LINAB1_0402 | 50S ribosomal protein L28                                                      |   | 0.705 | 0.708 | 0.707 |
| LINAB1_0406 | fatty acid/phospholipid synthesis protein PlsX                                 |   | 0.702 | 0.711 | 0.707 |
| LINAB1_0463 | prolyl-tRNA synthetase                                                         |   | 0.703 | 0.711 | 0.707 |
| LINAB1_1051 | 50S ribosomal protein L17                                                      |   | 0.694 | 0.72  | 0.707 |
| LINAB1_0058 | PTS system, mannose/fructose/N-acetylgalactosamine-specific IIA/IIB component  |   | 0.702 | 0.71  | 0.706 |
| LINAB1_0134 | seryl-tRNA synthetase                                                          |   | 0.699 | 0.713 | 0.706 |
| LINAB1_0887 | hypothetical protein                                                           |   | 0.706 | 0.705 | 0.706 |
| LINAB1_0952 | lysine                                                                         |   | 0.696 | 0.715 | 0.706 |
| LINAB1_0266 | aspartate racemase                                                             |   | 0.696 | 0.714 | 0.705 |
| LINAB1_0890 | D-methionine ABC superfamily ATP binding cassette transporter, binding protein |   | 0.697 | 0.712 | 0.705 |
| LINAB1_1045 | 30S ribosomal protein S9                                                       |   | 0.713 | 0.696 | 0.705 |
| LINAB1_0257 | DNA replication initiation control protein YabA                                |   | 0.712 | 0.696 | 0.704 |
| LINAB1_0204 | phenylalanine--tRNA ligase beta subunit                                        |   | 0.697 | 0.709 | 0.703 |
| LINAB1_0285 | orotate phosphoribosyltransferase                                              |   | 0.695 | 0.71  | 0.703 |

|             |                                           |   |       |       |       |
|-------------|-------------------------------------------|---|-------|-------|-------|
| LINAB1_0712 | non-heme iron-containing ferritin         |   | 0.708 | 0.698 | 0.703 |
| LINAB1_0169 | leucyl-tRNA synthetase                    |   | 0.698 | 0.706 | 0.702 |
| LINAB1_0856 | hypothetical protein                      |   | 0.729 | 0.674 | 0.702 |
| LINAB1_0963 | DNA-directed RNA polymerase subunit beta' |   | 0.698 | 0.705 | 0.702 |
| LINAB1_0231 | 6-phospho-beta-galactosidase              | * | 0.694 | 0.707 | 0.701 |
| LINAB1_0416 | dipeptidase                               |   | 0.699 | 0.702 | 0.701 |
| LINAB1_0718 | possible phosphate transport regulator    |   | 0.697 | 0.704 | 0.701 |
| LINAB1_0917 | hypothetical protein                      |   | 0.707 | 0.695 | 0.701 |
| LINAB1_0969 | lysyl-tRNA synthetase                     |   | 0.696 | 0.706 | 0.701 |
| LINAB1_0107 | CTP synthetase                            |   | 0.69  | 0.71  | 0.700 |
| LINAB1_0877 | teichoic acid biosynthesis protein        |   | 0.704 | 0.696 | 0.700 |
| LINAB1_1094 | conserved hypothetical protein            |   | 0.692 | 0.707 | 0.700 |

**Table S5. Predicted transport protein of *L. iners* AB-1. Substrate/Function predictions from TransAAP.**

| Gene ID     | FID     | Subfamily       | Substrate/Function                         | Family TC | Annotation                                                                                        | HGT | Possible pseudogene | avg CAI      | COG number | COG Class |
|-------------|---------|-----------------|--------------------------------------------|-----------|---------------------------------------------------------------------------------------------------|-----|---------------------|--------------|------------|-----------|
| LINAB1_1152 | ABC     | membrane        | amino acid (glutamine/glutamate/aspartate) | 3.A.1     | amino acid ABC superfamily ATP binding cassette transporter, membrane protein                     |     |                     | 0.608        | 765        | E         |
| LINAB1_1153 | ABC     | ABC             | amino acid (glutamine/glutamate/aspartate) | 3.A.1     | ABC-type polar amino acid transport system, ATPase component                                      |     |                     | 0.649        | 1126       | E         |
| LINAB1_1154 | ABC     | membrane        | multidrug                                  | 3.A.1     | ABC superfamily ATP binding cassette transporter, ABC protein possible MDR                        | *   |                     | 0.568        | 1132       | V         |
| LINAB1_1159 | DASS    |                 | sodium ion:anion symporter                 | 2.A.47    | di- and tricarboxylate transporter                                                                |     |                     | 0.583        | 1055       | P         |
| LINAB1_1163 | ABC     | ABC             | cobalt ion                                 | 3.A.1     | ABC-type cobalt transport system, ATPase component                                                |     |                     | 0.601        | 1123       | R         |
| LINAB1_1172 | NCS2    |                 | xanthine/uracil                            | 2.A.40    | NCS2 family nucleobase:cation symporter-2                                                         |     |                     | 0.571        | 2233       | F         |
| LINAB1_1177 | LIVCS   |                 | branched-chain amino acid                  | 2.A.26    | LIVCS family branched chain amino acid:cation symporter                                           |     |                     | 0.606        | 1114       | E         |
| LINAB1_1178 | APC     |                 | glutamate:GABA antiporter                  | 2.A.3     | glutamate gamma-aminobutyrate antiporter                                                          |     |                     | 0.597        | 531        | E         |
| LINAB1_1188 | Oxa1    |                 | 60 KD inner membrane protein OxaA homolog  | 2.A.9     | stage III sporulation protein J                                                                   |     |                     | 0.598        | 706        | U         |
| LINAB1_0028 | CIC     |                 | chloride ion channel                       | 2.A.49    | voltage-gated chloride channel family protein                                                     |     |                     | 0.570        | 38         | P         |
| LINAB1_0029 | MFS     |                 | multidrug efflux                           | 2.A.1     | major facilitator superfamily permease                                                            |     |                     | 0.582        | 2814       | G         |
| LINAB1_0030 | NCS2    |                 | xanthine/uracil                            | 2.A.40    | NCS2 family nucleobase:cation symporter-2                                                         |     |                     | 0.586        | 2252       | R         |
| LINAB1_0031 | ABC     | binding protein | sugar                                      | 3.A.1     | ABC superfamily ATP binding cassette transporter, binding protein                                 |     |                     | 0.633        | 1744       | R         |
| LINAB1_0032 | ABC     | binding protein | sugar                                      | 3.A.1     | ABC superfamily ATP binding cassette transporter, binding protein                                 |     |                     | <b>0.726</b> | 1744       | R         |
| LINAB1_0033 | ABC     | ABC             | sugar                                      | 3.A.1     | possible monosaccharide ABC superfamily ATP binding cassette transporter, ABC protein             |     |                     | 0.643        | 3845       | R         |
| LINAB1_0035 | ABC     | membrane        | sugar                                      | 3.A.1     | ABC superfamily ATP binding cassette transporter, membrane protein                                |     |                     | 0.540        | 4603       | R         |
| LINAB1_0036 | ABC     | membrane        | sugar                                      | 3.A.1     | ABC superfamily ATP binding cassette transporter, membrane protein                                |     |                     | 0.594        | 1079       | R         |
| LINAB1_0038 | POT     |                 | proton:dipeptide/tripeptide symporter      | 2.A.17    | dipeptide/tripeptide transport protein                                                            |     |                     | 0.583        | 3104       | E         |
| LINAB1_0042 | NCS2    |                 | xanthine/uracil                            | 2.A.40    | NCS2 family nucleobase:cation symporter-2                                                         |     |                     | 0.609        | 2252       | R         |
| LINAB1_0044 | CPA2    |                 | potassium/sodium ion:proton antiporter     | 2.A.37    | Na-H antiporter                                                                                   |     |                     | 0.604        | 475        | P         |
| LINAB1_0052 | ABC     | membrane        | efflux (antimicrobial peptide)             | 3.A.1     | ABC superfamily ATP binding cassette transporter, membrane protein, possible antimicrobial efflux |     |                     | 0.579        | 577        | V         |
| LINAB1_0054 | ABC     | ABC             | efflux (antimicrobial peptide)             | 3.A.1     | ABC superfamily ATP binding cassette transporter, ABC protein, possible antimicrobial efflux      |     |                     | 0.562        | 1136       | V         |
| LINAB1_0055 | APC     |                 | amino acid                                 | 2.A.3     | amino acid transporter                                                                            |     |                     | 0.584        | 531        | E         |
| LINAB1_0935 | SSPTS   | EnzymeIIA       | glucitol/sorbitol                          | 4.A       | glucitol/sorbitol PTS, EIIA                                                                       |     |                     | 0.685        | 3731       | G         |
| LINAB1_0934 | AI-2E   |                 | Autoinducer-2 export                       | 2.A.86    | putative permease                                                                                 |     |                     | 0.613        | 628        | R         |
| LINAB1_0931 | S-DNA-T |                 | cell division/septum DNA translocation     | 3.A.12    | FtsK/SpoIIIE family DNA translocase                                                               |     |                     | 0.584        | 1674       | D         |
| LINAB1_0919 | IISP    |                 | preprotein translocase SecA                | 3.A.5     | preprotein translocase subunit SecA                                                               |     |                     | 0.663        | 653        | U         |
| LINAB1_0898 | IISP    |                 | preprotein translocase SecG                | 3.A.5     | Preprotein translocase subunit SecG                                                               |     |                     | 0.516        | 1314       | U         |
| LINAB1_0894 | ABC     | binding protein | manganese/zinc ion                         | 3.A.1     | Zinc ABC transporter, periplasmic-binding protein ZnuA                                            | *   | *                   | <b>0.717</b> | 803        | P         |
| LINAB1_0893 | ABC     | ABC             | manganese/zinc ion                         | 3.A.1     | putative zinc ABC transporter ATP-binding protein                                                 |     |                     | 0.636        | 1121       | P         |
| LINAB1_0892 | ABC     | membrane        | manganese/zinc ion                         | 3.A.1     | putative zinc ABC transporter permease protein                                                    | *   |                     | 0.607        | 1108       | P         |
| LINAB1_0364 | NCS1    |                 | cytosine/purines/uracil/thiamine/allantoin | 2.A.39    | cytosine permease                                                                                 |     |                     | 0.569        | 1457       | F         |
| LINAB1_0361 | ABC     | binding protein | manganese/zinc ion                         | 3.A.1     | ABC-type metal ion transport system, periplasmic component/surface adhesin                        |     |                     | 0.677        | 803        | P         |
| LINAB1_0353 | ABC     | binding protein | spermidine/putrescine                      | 3.A.1     | spermidine/putrescine ABC superfamily ATP binding cassette transporter, binding protein           |     |                     | 0.671        | 687        | E         |
| LINAB1_0352 | ABC     | membrane        | spermidine/putrescine                      | 3.A.1     | spermidine/putrescine ABC transporter permease                                                    |     |                     | 0.618        | 1177       | E         |

|             |          |                 |                                                |        |                                                                                          |   |              |      |    |
|-------------|----------|-----------------|------------------------------------------------|--------|------------------------------------------------------------------------------------------|---|--------------|------|----|
| LINAB1_0351 | ABC      | membrane        | spermidine/putrescine                          | 3.A.1  | spermidine/putrescine ABC superfamily ATP binding cassette transporter, membrane protein |   | 0.647        | 1176 | E  |
| LINAB1_0350 | ABC      | ABC             | spermidine/putrescine                          | 3.A.1  | spermidine/putrescine ABC transporter ATPase                                             |   | 0.633        | 3842 | E  |
|             | ABC      | binding protein | sugar                                          | 3.A.1  | ABC-type sugar transport system, periplasmic component                                   |   | <b>0.742</b> | 1653 | G  |
| LINAB1_0341 |          |                 |                                                |        |                                                                                          |   |              |      |    |
| LINAB1_0339 | ABC      | membrane        | sugar                                          | 3.A.1  | ABC-type sugar transport system, permease component                                      |   | 0.603        | 395  | G  |
| LINAB1_0338 | ABC      | membrane        | sugar                                          | 3.A.1  | ABC-type sugar transport system, permease component                                      |   | 0.608        | 1175 | G  |
| LINAB1_0337 | ABC      | ABC             | spermidine/putrescine                          | 3.A.1  | ABC transporter ATPase component                                                         |   | 0.622        | 3842 | E  |
| LINAB1_0333 | APC      |                 | amino acid                                     | 2.A.3  | APC family amino acid transporter                                                        |   | 0.551        | 1113 | E  |
| LINAB1_0880 | MFS      |                 | tetracycline efflux                            | 2.A.1  | major facilitator superfamily permease                                                   |   | 0.613        | -    | -  |
| LINAB1_0876 | MOP      | PST             | polysaccharide export                          | 2.A.66 | PST family polysaccharide transporter                                                    |   | 0.619        | 2244 | R  |
| LINAB1_0870 | P-ATPase |                 | calcium ion                                    | 3.A.3  | cation-transporting ATPase                                                               |   | 0.643        | 474  | P  |
| LINAB1_0857 | NhaC     |                 | sodium ion:proton antiporter                   | 2.A.35 | Na <sup>+</sup> -H <sup>+</sup> -exchanging protein                                      |   | 0.571        | 1757 | C  |
| LINAB1_0713 | ABC      | membrane        | unknown substrate                              | 3.A.1  | FeS assembly protein SufB                                                                |   | 0.667        | 719  | O  |
| LINAB1_0716 | ABC      | membrane        | unknown substrate                              | 3.A.1  | FeS assembly protein SufD                                                                |   | 0.641        | 719  | O  |
| LINAB1_0717 | ABC      | ABC             | unknown substrate                              | 3.A.1  | Iron-sulfur cluster assembly ATPase protein SufC                                         |   | 0.652        | 396  | O  |
| LINAB1_0719 | PiT      |                 | phosphate                                      | 2.A.20 | PiT family inorganic phosphate transporter                                               |   | 0.635        | 306  | P  |
| LINAB1_0720 | ABC      | ABC             | amino acid (glutamine/glutamate/aspartate)     | 3.A.1  | amino acid ABC superfamily ATP binding cassette transporter, ATP-binding                 |   | 0.610        | 1126 | E  |
| LINAB1_0721 | ABC      | membrane        | amino acid (glutamine/glutamate/aspartate)     | 3.A.1  | amino acid ABC superfamily ATP binding cassette transporter, membrane protein            |   | 0.649        | 765  | E  |
| LINAB1_0766 | F-ATPase |                 | protons                                        | 3.A.2  | F0F1 ATP synthase subunit epsilon                                                        |   | <b>0.716</b> | 355  | C  |
| LINAB1_0767 | F-ATPase |                 | protons                                        | 3.A.2  | F0F1 ATP synthase subunit beta                                                           |   | 0.642        | 55   | C  |
| LINAB1_0768 | F-ATPase |                 | protons                                        | 3.A.2  | F0F1 ATP synthase subunit gamma                                                          |   | 0.615        | 224  | C  |
| LINAB1_0769 | F-ATPase |                 | protons                                        | 3.A.2  | H(+)-transporting two-sector ATPase                                                      |   | 0.652        | 56   | C  |
| LINAB1_0770 | F-ATPase |                 | protons                                        | 3.A.2  | ATP synthase subunit delta                                                               |   | 0.568        | 712  | C  |
| LINAB1_0771 | F-ATPase |                 | protons                                        | 3.A.2  | ATP synthase subunit B                                                                   |   | 0.638        | 711  | C  |
| LINAB1_0772 | F-ATPase |                 | protons                                        | 3.A.2  | ATP synthase subunit C                                                                   |   | 0.683        | 636  | C  |
| LINAB1_0773 | F-ATPase |                 | protons                                        | 3.A.2  | ATP synthase subunit A                                                                   |   | 0.554        | 356  | C  |
| LINAB1_0781 | ABC      | membrane        | sodium ion efflux                              | 3.A.1  | ABC transporter permease protein, possible sodium efflux                                 |   | 0.656        | 1668 | CP |
| LINAB1_0782 | ABC      | ABC             | sodium ion efflux                              | 3.A.1  | ABC transporter ATPase component                                                         |   | 0.565        | 4152 | R  |
| LINAB1_0281 | ABC      | ABC             | multidrug                                      | 3.A.1  | ABC transporter, ATP-binding protein, possible MDR                                       |   | 0.608        | 1131 | V  |
| LINAB1_0283 | FeoB     |                 | ferrous ion                                    | 9.A.8  | GTP-binding protein HflX                                                                 |   | 0.588        | 2262 | R  |
| LINAB1_0287 | MFS      |                 | metabolite (benzoate)                          | 2.A.1  | major facilitator superfamily permease                                                   |   | 0.600        | 2814 | G  |
| LINAB1_0297 | ABC      | ABC             | unknown substrate                              | 3.A.1  | ABC transporter ATPase component                                                         |   | 0.623        | 488  | R  |
| LINAB1_0305 | IISP     |                 | preprotein translocase YajC                    | 3.A.5  | preprotein translocase subunit YajC                                                      | * | <b>0.724</b> | 1862 | U  |
|             | MscS     |                 | small-conductance mechanosensitive ion channel | 1.A.23 | small-conductance mechanosensitive channel                                               |   | 0.530        | 668  | M  |
| LINAB1_0319 |          |                 |                                                |        |                                                                                          |   |              |      |    |
| LINAB1_0960 | ABC      | ABC             | manganese/zinc ion                             | 3.A.1  | zinc/ion ABC superfamily ATP binding cassette transporter, ABC protein                   |   | 0.602        | 1121 | P  |
| LINAB1_0959 | ABC      | membrane        | manganese/zinc ion                             | 3.A.1  | metal cation ABC superfamily ATP binding cassette transporter, membrane protein          |   | 0.597        | 1108 | P  |
| LINAB1_0957 | KUP      |                 | potassium ion uptake                           | 2.A.72 | KUP family potassium (K <sup>+</sup> ) uptake permease                                   |   | 0.620        | 3158 | P  |
| LINAB1_1040 | CDF      |                 | cation efflux                                  | 2.A.4  | CDF family cation diffusion facilitator                                                  |   | 0.642        | 1230 | P  |
| LINAB1_1027 | MFS      |                 | cyanate                                        | 2.A.1  | major facilitator superfamily permease                                                   |   | 0.554        | 2807 | P  |
| LINAB1_1019 | NCS2     |                 | xanthine/uracil                                | 2.A.40 | xanthine/uracil permease                                                                 |   | 0.628        | 2233 | F  |
| LINAB1_1008 | S-DNA-T  |                 | cell division/septum DNA translocation         | 3.A.12 | FtsK family DNA segregation ATPase                                                       |   | 0.566        | 1674 | D  |
| LINAB1_0992 | P-ATPase |                 | copper ion                                     | 3.A.3  | copper-exporting ATPase                                                                  | * | 0.547        | 2217 | P  |

|             |          |                 |                                                  |        |                                                                                             |   |              |      |    |
|-------------|----------|-----------------|--------------------------------------------------|--------|---------------------------------------------------------------------------------------------|---|--------------|------|----|
| LINAB1_0985 | MFS      |                 | sugar                                            | 2.A.1  | major facilitator sugar transporter                                                         |   | 0.619        | 2211 | G  |
| LINAB1_0385 | ABC      | membrane        | cobalt ion                                       | 3.A.1  | ABC-type transport system, permease component                                               |   | 0.627        | 619  | P  |
| LINAB1_0386 | ABC      | ABC             | dipeptide/oligopeptide                           | 3.A.1  | ATPase component of various ABC-type transport systems with duplicated ATPase domain        |   | 0.660        | 1123 | R  |
|             | ABC      | binding protein | unknown substrate                                | 3.A.1  | ABC transporter substrate-binding protein                                                   |   | 0.669        | 2984 | R  |
| LINAB1_0389 |          |                 |                                                  |        |                                                                                             |   |              |      |    |
| LINAB1_0390 | ABC      | membrane        | unknown substrate                                | 3.A.1  | ABC transporter permease component                                                          |   | 0.553        | 4120 | R  |
| LINAB1_0391 | ABC      | ABC             | unknown substrate                                | 3.A.1  | ABC superfamily ATP binding cassette transporter, ABC protein                               |   | 0.657        | 1101 | R  |
| LINAB1_0392 | MFS      |                 | multidrug efflux                                 | 2.A.1  | major facilitator superfamily permease                                                      |   | 0.614        | 2814 | G  |
| LINAB1_0393 | ABC      | ABC             | manganese/zinc ion                               | 3.A.1  | ABC-type metallic cation transport system, ATPase component                                 |   | 0.604        | 1121 | P  |
| LINAB1_0394 | ABC      | membrane        | polysaccharide export                            | 3.A.1  | ABC-2 transporter, permease protein, putative                                               |   | 0.620        | 1682 | GM |
| LINAB1_0395 | NCS2     |                 | xanthine/uracil                                  | 2.A.40 | NCS family uracil:cation symporter                                                          |   | 0.542        | 2233 | F  |
| LINAB1_0396 | MFS      |                 | multidrug efflux                                 | 2.A.1  | MFS family major facilitator transporter                                                    |   | 0.637        | 2814 | G  |
| LINAB1_0398 | ABC      | ABC             | amino acid (glutamine/glutamate/aspartate)       | 3.A.1  | ABC-type polar amino acid transport system, ATPase component                                |   | 0.633        | 1126 | E  |
|             | ABC      | binding protein | amino acid (glutamine/glutamate/aspartate)       | 3.A.1  | amino acid ABC superfamily ATP binding cassette transporter, binding protein                |   | 0.602        | 834  | ET |
| LINAB1_0399 |          |                 |                                                  |        |                                                                                             |   |              |      |    |
| LINAB1_0400 | ABC      | membrane        | amino acid (glutamine/glutamate/aspartate)       | 3.A.1  | ABC-type amino acid transport system, permease component                                    |   | 0.595        | 765  | E  |
| LINAB1_0401 | ABC      | membrane        | amino acid (glutamine/glutamate/aspartate)       | 3.A.1  | glutamine ABC transporter membrane protein                                                  |   | 0.585        | 765  | E  |
| LINAB1_0408 | ABC      | ABC             | dipeptide/oligopeptide                           | 3.A.1  | ABC superfamily oligopeptide transport ATP-binding protein oppD                             |   | 0.657        | 444  | EP |
| LINAB1_0409 | ABC      | ABC             | oligopeptide                                     | 3.A.1  | ABC superfamily oligopeptide transport ATP-binding protein oppF                             |   | 0.679        | 1123 | R  |
| LINAB1_0410 | ABC      | membrane        | dipeptide/oligopeptide                           | 3.A.1  | ABC superfamily oligopeptide transport system permease protein oppB                         |   | 0.671        | 601  | EP |
| LINAB1_0411 | ABC      | membrane        | dipeptide/oligopeptide                           | 3.A.1  | ABC superfamily oligopeptide transport system permease protein oppC                         |   | 0.674        | 1173 | EP |
|             | ABC      | binding protein | dipeptide/oligopeptide                           | 3.A.1  | ABC superfamily oligopeptide ABC transporter, periplasmic oligopeptide-binding protein oppA |   | <b>0.735</b> | 747  | E  |
| LINAB1_0412 |          |                 |                                                  |        |                                                                                             |   |              |      |    |
| LINAB1_0415 | IISP     |                 | signal recognition particle-docking protein FtsY | 3.A.5  | signal recognition particle docking protein FtsY                                            | * | 0.639        | 552  | U  |
| LINAB1_0443 | IISP     |                 | signal recognition particle (SRP54)              | 3.A.5  | Signal recognition particle GTPase                                                          |   | 0.682        | 541  | U  |
| LINAB1_0452 | ABC      | membrane        | multidrug                                        | 3.A.1  | ABC-type multidrug transport system, ATPase                                                 |   | 0.647        | 1132 | V  |
| LINAB1_0453 | ABC      | membrane        | multidrug                                        | 3.A.1  | ABC-type multidrug transport system, ATPase                                                 |   | 0.649        | 1132 | V  |
| LINAB1_0698 | HCC      |                 | hemolysin C (HlyC) homolog                       | 9.A.40 | hemolysin                                                                                   |   | 0.655        | 1253 | R  |
| LINAB1_0684 | HCC      |                 | hemolysin C (HlyC) homolog                       | 9.A.40 | hemolysin family protein                                                                    |   | 0.599        | 1253 | R  |
| LINAB1_0669 | SSPTS    | EnzymeIIABC     | fructose                                         | 4.A    | PTS family fructose/mannitol porter component IIABC                                         |   | <b>0.710</b> | 1299 | G  |
| LINAB1_0659 | Oxa1     |                 | 60 KD inner membrane protein OxaA homolog        | 2.A.9  | preprotein translocase subunit YidC                                                         |   | 0.628        | 706  | U  |
| LINAB1_0650 | SSPTS    | EnzymeIIA       | mannose/fructose                                 | 4.A    | PTS system, mannose/fructose family IIA component                                           |   | 0.658        | 2893 | G  |
| LINAB1_0649 | SSPTS    | EnzymeIIB       | mannose/fructose                                 | 4.A    | PTS system, mannose/fructose family IIB component                                           |   | 0.674        | 3444 | G  |
| LINAB1_0648 | SSPTS    | EnzymeIIC       | mannose/fructose                                 | 4.A    | PTS system, mannose/fructose family IIC component                                           |   | 0.691        | 3715 | G  |
| LINAB1_0647 | SSPTS    | EnzymeIID       | mannose/fructose                                 | 4.A    | PTS system, mannose/fructose family IID component                                           |   | 0.692        | 3716 | G  |
| LINAB1_0646 | -        | -               | -                                                |        | MgtC family protein                                                                         |   | 0.621        | 1285 | S  |
| LINAB1_0634 | MFS      |                 | multidrug efflux                                 | 2.A.1  | major facilitator superfamily permease                                                      | * | 0.583        | 2814 | G  |
| LINAB1_0633 | ABC      | ABC             | glycine betaine/L-proline/carnitine/choline      | 3.A.1  | ABC-type proline/glycine betaine transport system, ATPase component                         |   | 0.683        | 1125 | E  |
|             | ABC      | binding protein | glycine betaine/L-proline/carnitine/choline      | 3.A.1  | ABC superfamily ATP binding cassette transporter, membrane protein                          |   | 0.632        | 1732 | M  |
| LINAB1_0632 |          |                 |                                                  |        |                                                                                             |   |              |      |    |
| LINAB1_0629 | P-ATPase |                 | cation                                           | 3.A.3  | cation-transporting ATPase                                                                  |   | 0.619        | 474  | P  |
| LINAB1_0625 | ABC      | ABC             | unknown substrate                                | 3.A.1  | ABC superfamily ATP binding cassette transporter, ABC protein                               |   | 0.674        | 488  | R  |
| LINAB1_0624 | ABC      | ABC             | D-methionine                                     | 3.A.1  | D-Methionine ABC transporter ATP-binding protein                                            |   | 0.668        | 1135 | P  |
| LINAB1_0623 | ABC      | membrane        | D-methionine                                     | 3.A.1  | D-Methionine ABC transporter permease protein                                               |   | 0.643        | 2011 | P  |

|             |          |                 |                                            |        |                                                                                       |   |              |      |    |
|-------------|----------|-----------------|--------------------------------------------|--------|---------------------------------------------------------------------------------------|---|--------------|------|----|
| LINAB1_0622 | ThrE     |                 | unknown substrate                          | 2.A.79 | integral membrane protein                                                             |   | 0.618        | 2966 | S  |
| LINAB1_0597 | ABC      | ABC             | multidrug                                  | 3.A.1  | ABC superfamily ATP binding cassette transporter ABC protein                          |   | 0.513        | 1131 | V  |
| LINAB1_1048 | ABC      | membrane        | cobalt ion                                 | 3.A.1  | cobalt/nickel ABC superfamily ATP binding cassette transporter, membrane protein      |   | 0.587        | 619  | P  |
| LINAB1_1049 | ABC      | ABC             | cobalt ion                                 | 3.A.1  | cobalt/nickel ABC superfamily ATP binding cassette transporter, ABC protein           |   | 0.632        | 1122 | P  |
| LINAB1_1050 | ABC      | ABC             | cobalt ion                                 | 3.A.1  | cobalt/nickel ABC superfamily ATP binding cassette transporter, ABC protein           |   | 0.638        | 1122 | P  |
| LINAB1_1058 | IISP     |                 | preprotein translocase Sec61 alpha subunit | 3.A.5  | preprotein translocase subunit SecY                                                   |   | 0.588        | 201  | U  |
| LINAB1_1088 | P-ATPase |                 | magnesium ion                              | 3.A.3  | magnesium-translocating P-type ATPase                                                 |   | 0.597        | 474  | P  |
| LINAB1_1095 | ABC      | ABC             | manganese/zinc ion                         | 3.A.1  | ABC transporter, ATP-binding protein                                                  |   | 0.601        | 1121 | P  |
| LINAB1_1096 | ABC      | membrane        | polysaccharide export                      | 3.A.1  | ABC-type transport system, permease component                                         |   | 0.655        | 1682 | GM |
| LINAB1_1103 | MFS      |                 | multidrug efflux                           | 2.A.1  | major facilitator superfamily transporter permease                                    |   | 0.627        | 2271 | G  |
| LINAB1_1107 | MIP      |                 | glycerol uptake                            | 1.A.8  | glycerol uptake facilitator related permease (major Intrinsic protein family)         |   | 0.597        | 580  | G  |
| LINAB1_1119 | ABC      | ABC             | multidrug                                  | 3.A.1  | ABC transporter, ATP-binding protein                                                  |   | 0.636        | 4586 | R  |
| LINAB1_1120 | ABC      | membrane        | multidrug                                  | 3.A.1  | partial ABC superfamily ATP binding cassette transporter, permease component          |   | 0.540        | 4587 | R  |
| LINAB1_1121 | ABC      | membrane        | multidrug                                  | 3.A.1  | ABC transporter, permease protein                                                     |   | 0.627        | 3694 | R  |
| LINAB1_1125 | ABC      | membrane        | multidrug                                  | 3.A.1  | ABC superfamily ATP binding cassette transporter                                      |   | 0.591        | 1132 | V  |
| LINAB1_1126 | SSPTS    | EnzymeIIA       | mannose/fructose                           | 4.A    | phosphotransferase system, mannose/fructose-specific component IIA                    |   | 0.591        | 2893 | G  |
| LINAB1_0148 | ABC      | ABC             | phosphate                                  | 3.A.1  | phosphate ABC transporter, ATP-binding protein                                        |   | 0.614        | 1117 | P  |
| LINAB1_0147 | ABC      | ABC             | phosphate                                  | 3.A.1  | phosphate ABC transporter ATP-binding protein                                         |   | 0.563        | 1117 | P  |
| LINAB1_0146 | ABC      | membrane        | phosphate                                  | 3.A.1  | phosphate ABC superfamily ATP binding cassette transporter, membrane protein          |   | 0.610        | 581  | P  |
| LINAB1_0145 | ABC      | membrane        | phosphate                                  | 3.A.1  | phosphate ABC superfamily ATP binding cassette transporter transmembrane protein      |   | 0.567        | 573  | P  |
| LINAB1_0144 | ABC      | binding protein | phosphate                                  | 3.A.1  | phosphate ABC superfamily ATP binding cassette transporter, binding protein           |   | 0.592        | 226  | P  |
| LINAB1_0142 | ABC      | ABC             | efflux (antimicrobial peptide)             | 3.A.1  | ABC transporter, ATP-binding protein                                                  |   | 0.584        | 1136 | V  |
| LINAB1_0141 | ABC      | membrane        | lipoprotein releasing                      | 3.A.1  | ABC superfamily ATP binding cassette transporter, membrane protein                    |   | 0.618        | 4591 | M  |
| LINAB1_0139 | SSPTS    | EnzymeIIA       | glucose                                    | 4.A    | phosphoenolpyruvate-dependent sugar phosphotransferase system EIIA, glucose specific  |   | 0.618        | 2190 | G  |
| LINAB1_0136 | SSPTS    | EnzymeIIBC      | glucose/maltose/N-acetylglucosamine        | 4.A    | phosphoenolpyruvate-dependent sugar phosphotransferase system EIIBC, arbutin specific | * | 0.647        | 1263 | G  |
| LINAB1_0111 | ABC      | membrane        | multidrug                                  | 3.A.1  | ABC superfamily ATP binding cassette transporter, predicted lactococcin A/multidrug   |   | 0.598        | 1132 | V  |
| LINAB1_0110 | ABC      | membrane        | multidrug                                  | 3.A.1  | ABC transporter ATPase and permease components                                        |   | 0.557        | 1132 | V  |
| LINAB1_0109 | MIP      |                 | glycerol uptake                            | 1.A.8  | glycerol uptake facilitator protein                                                   |   | 0.683        | 580  | G  |
| LINAB1_0080 | ABC      | membrane        | sugar (maltose)                            | 3.A.1  | Maltose/maltodextrin ABC transporter, permease protein MalG                           |   | 0.611        | 3833 | G  |
| LINAB1_0079 | ABC      | membrane        | sugar                                      | 3.A.1  | Maltose/maltodextrin ABC transporter, permease protein MalF                           |   | 0.585        | 1175 | G  |
| LINAB1_0078 | ABC      | binding protein | sugar (maltose)                            | 3.A.1  | Maltose/maltodextrin ABC transporter, substrate binding periplasmic protein MalE      |   | <b>0.800</b> | 2182 | G  |
| LINAB1_0077 | ABC      | ABC             | sugar (maltose)                            | 3.A.1  | ABC-type sugar transport system, ATPase component                                     |   | 0.697        | 3839 | G  |
| LINAB1_0069 | APC      |                 | amino acid                                 | 2.A.3  | amino acid transporter                                                                |   | 0.563        | 531  | E  |
| LINAB1_0064 | ABC      | ABC             | manganese/zinc ion                         | 3.A.1  | ABC transporter ATPase component                                                      | * | 0.586        | 1121 | P  |
| LINAB1_0063 | ABC      | membrane        | toxin secretion                            | 3.A.1  | ABC-type multidrug/protein/lipid transport system, SunT-containing, ATPase component  | * | 0.617        | 2274 | V  |
| LINAB1_0062 | APC      |                 | amino acid                                 | 2.A.3  | APC family amino acid-polyamine-organocation transporter                              |   | 0.626        | 1113 | E  |
| LINAB1_0060 | SSPTS    | EnzymeIID       | mannose/fructose                           | 4.A    | PTS system, mannose-specific IID component                                            |   | <b>0.736</b> | 3716 | G  |
| LINAB1_0059 | SSPTS    | EnzymeIIC       | mannose/fructose                           | 4.A    | PTS system, mannose-specific IIC component                                            |   | 0.679        | 3715 | G  |
| LINAB1_0058 | SSPTS    | EnzymeIIAB      | mannose/fructose                           | 4.A    | PTS system, mannose-specific IIA/IIB component                                        |   | <b>0.706</b> | 3444 | G  |
| LINAB1_0245 | ThrE     |                 | unknown substrate                          | 2.A.79 | Integral membrane protein                                                             |   | 0.603        | 2966 | S  |
| LINAB1_0230 | SSPTS    | EnzymeIIBC      | cellobiose                                 | 4.A    | PTS system, lactose-specific IIB/IIC component                                        | * | 0.639        | 1455 | G  |

|             |       |                 |                                      |        |                                                                                |   |              |      |    |
|-------------|-------|-----------------|--------------------------------------|--------|--------------------------------------------------------------------------------|---|--------------|------|----|
| LINAB1_0226 | SSPTS | EnzymeIIA       | mannose/fructose                     | 4.A    | PTS system, mannose-specific IIA component                                     |   | 0.596        | 2893 | G  |
| LINAB1_0225 | SSPTS | EnzymeIID       | mannose/fructose                     | 4.A    | PTS system, mannose-specific IID component                                     |   | 0.624        | 3716 | G  |
| LINAB1_0224 | SSPTS | EnzymeIIC       | mannose/fructose                     | 4.A    | PTS system, mannose-specific IIC component                                     |   | 0.559        | 3715 | G  |
| LINAB1_0223 | SSPTS | EnzymeIIB       | mannose/fructose                     | 4.A    | PTS system, mannose-specific IIB component                                     |   | 0.645        | 3444 | G  |
| LINAB1_0214 | GPTS  | EnzymeI         | unknown substrate                    | 4.A    | phosphoenolpyruvate-protein phosphotransferase (enzyme I)                      |   | 0.699        | 1080 | G  |
| LINAB1_0213 | GPTS  | HPr             | unknown substrate                    | 4.A    | Phosphocarrier protein of PTS system HPr                                       |   | <b>0.715</b> | 1925 | G  |
| LINAB1_0208 | ABC   | membrane        | sodium ion efflux                    | 3.A.1  | putative ABC transporter permease component                                    |   | 0.573        | 1668 | CP |
| LINAB1_0207 | ABC   | ABC             | multidrug                            | 3.A.1  | ABC transporter, ATP-binding subunit, predicted bacitracin/multidrug transport |   | 0.573        | 1131 | V  |
| LINAB1_0888 | LIVCS |                 | branched-chain amino acid            | 2.A.26 | LIVCS family branched chain amino acid:cation symporter                        |   | 0.674        | 1114 | E  |
|             | ABC   | binding protein | D-methionine                         | 3.A.1  | D-methionine ABC superfamily ATP binding cassette transporter, binding protein |   | <b>0.705</b> | 1464 | P  |
| LINAB1_0890 |       |                 |                                      |        |                                                                                |   |              |      |    |
| LINAB1_0789 | ABC   | membrane        | lipoprotein releasing                | 3.A.1  | ABC superfamily ATP binding cassette transporter, permease protein             |   | 0.602        | 3127 | Q  |
| LINAB1_0790 | ABC   | ABC             | efflux (antimicrobial peptide)       | 3.A.1  | ABC superfamily ATP binding cassette transporter, ABC protein                  | * | 0.594        | 1136 | V  |
|             | ABC   | binding protein | sugar                                | 3.A.1  | sugar ABC superfamily ATP binding cassette transporter, periplasmic component  |   | <b>0.709</b> | 1653 | G  |
| LINAB1_0793 |       |                 |                                      |        |                                                                                |   |              |      |    |
| LINAB1_0201 | ABC   | membrane        | multidrug/exoprotein (EcsBA homolog) | 3.A.1  | ABC transporter, permease protein                                              |   | 0.552        | 4473 | U  |
| LINAB1_0200 | ABC   | ABC             | multidrug                            | 3.A.1  | ABC-type multidrug transport system, ATPase component                          |   | 0.670        | 1131 | V  |
| LINAB1_0175 | SSPTS | EnzymeIIC       | galactitol                           | 4.A    | PTS system, galactitol-specific IIC component                                  |   | 0.644        | 3775 | G  |
| LINAB1_0174 | SSPTS | EnzymeIIB       | galactitol                           | 4.A    | PTS system, galactitol-specific IIB component                                  |   | 0.647        | 3414 | G  |
| LINAB1_0173 | SSPTS | EnzymeIIA       | fructose                             | 4.A    | PTS system, galactitol-specific IIA component                                  |   | 0.689        | 1762 | GT |
| LINAB1_0170 | MOP   | PST             | polysaccharide export                | 2.A.66 | polysaccharide transporter                                                     |   | 0.582        | 2244 | R  |
| LINAB1_0168 | MFS   |                 | multidrug efflux                     | 2.A.1  | major facilitator transporter, putative multidrug transport                    |   | 0.607        | 2814 | G  |
| LINAB1_0268 | MFS   |                 | multidrug efflux                     | 2.A.1  | permease of the major facilitator superfamily                                  |   | 0.429        | -    | -  |
| LINAB1_0828 | CadD  |                 | cadmium ion                          | 2.A.77 | Cadmium resistance protein                                                     | * | 0.483        | 4300 | P  |
| LINAB1_0823 | ABC   | ABC             | unknown substrate                    | 3.A.1  | ABC superfamily ATP binding cassette transporter, ABC protein                  | * | 0.538        | 488  | R  |
| LINAB1_0813 | -     | -               | -                                    | -      | Major facilitator superfamily protein                                          |   | 0.534        | -    | -  |
| LINAB1_0024 | -     | -               | -                                    | -      | major facilitator superfamily permease                                         |   | 0.571        | -    | -  |
| LINAB1_1164 | -     | -               | -                                    | -      | ABC transporter permease component                                             |   | 0.557        | 619  | P  |
| LINAB1_1138 | -     | -               | -                                    | -      | ABC transporter membrane-spanning permease - macrolide efflux                  |   | 0.571        | -    | -  |
| LINAB1_1043 | -     | -               | -                                    | -      | Multidrug resistance transport protein                                         |   | 0.613        | 2076 | P  |
| LINAB1_1025 | -     | -               | -                                    | -      | preprotein translocase subunit SecE                                            |   | 0.679        | 690  | U  |



**Table S6. *L. iners* ORFs with significant hits to conserved adhesion/host interaction domains adapted from Kankainen, et al. 2009.**

| Type             | Pfam ID | Gene ID     | e-value |
|------------------|---------|-------------|---------|
| General adhesion | PF00028 | -           | -       |
|                  | PF01468 | -           | -       |
|                  | PF01473 | -           | -       |
|                  | PF01856 | -           | -       |
|                  | PF02216 | -           | -       |
|                  | PF03351 | -           | -       |
|                  | PF03642 | -           | -       |
|                  | PF03895 | -           | -       |
|                  | PF04122 | -           | -       |
|                  | PF04829 | -           | -       |
|                  | PF04830 | -           | -       |
|                  | PF05062 | -           | -       |
|                  | PF05321 | -           | -       |
|                  | PF05345 | LINAB1_0795 | 0.0003  |
|                  | PF05594 | -           | -       |
|                  | PF05860 | -           | -       |
|                  | PF06435 | -           | -       |
|                  | PF06443 | -           | -       |
|                  | PF07501 | -           | -       |
|                  | PF07675 | -           | -       |
| PF07705          | -       | -           |         |
| PF08374          | -       | -           |         |
| PF08964          | -       | -           |         |
| Collagen         | PF00039 | -           | -       |
|                  | PF00040 | -           | -       |
|                  | PF00041 | -           | -       |
|                  | PF05737 | -           | -       |
|                  | PF05738 | -           | -       |
|                  | PF01391 | -           | -       |
|                  | PF02352 | -           | -       |
| Epithelium       | PF03212 | -           | -       |
|                  | PF05594 | -           | -       |
|                  | PF05860 | -           | -       |
|                  | PF06744 | -           | -       |
|                  | PF06761 | -           | -       |
| Fibrin           | PF09131 | -           | -       |
|                  | PF08017 | -           | -       |

|             |          |             |           |   |
|-------------|----------|-------------|-----------|---|
| Fibronectin | PF02412  | -           | -         |   |
|             | PF02707  | -           | -         |   |
|             | PF02722  | -           | -         |   |
|             | PF02986  | -           | -         |   |
|             | PF05670  | LINAB1_0564 | 1.10E-21  |   |
|             | PF05833  | LINAB1_0564 | 1.40E-119 |   |
|             | PF07012  | -           | -         |   |
|             | PF07174  | -           | -         |   |
|             | PF07299  | -           | -         |   |
|             | PF07554  | -           | -         |   |
|             | PF07564  | -           | -         |   |
|             | Flagella | PF02465     | -         | - |
|             |          | PF07195     | -         | - |
| PF05211     |          | -           | -         |   |
| Ig          | PF00047  | -           | -         |   |
|             | PF02246  | -           | -         |   |
|             | PF02494  | -           | -         |   |
|             | PF02368  | -           | -         |   |
|             | PF02369  | -           | -         |   |
|             | PF07523  | -           | -         |   |
|             | PF07532  | -           | -         |   |
|             | PF07679  | -           | -         |   |
|             | PF07686  | -           | -         |   |
|             | Intimin  | PF02369     | -         | - |
| PF02368     |          | -           | -         |   |
| PF03549     |          | -           | -         |   |
| PF07489     |          | -           | -         |   |
| PF07490     |          | -           | -         |   |
| PF07979     |          | -           | -         |   |
| Invasin     | PF05658  | -           | -         |   |
|             | PF05662  | -           | -         |   |
|             | PF05775  | -           | -         |   |
|             | PF09134  | -           | -         |   |
| Lamin       | PF02210  | -           | -         |   |
|             | PF00054  | -           | -         |   |
| Lectin      | PF00059  | -           | -         |   |
|             | PF00139  | -           | -         |   |
|             | PF00652  | -           | -         |   |
|             | PF01419  | -           | -         |   |
|             | PF01453  | -           | -         |   |
|             | PF07472  | -           | -         |   |
|             | PF07828  | -           | -         |   |
| PF07938     | -        | -           |           |   |

|               |         |             |          |
|---------------|---------|-------------|----------|
|               | PF07979 | -           | -        |
|               | PF09160 | -           | -        |
|               | PF09222 | -           | -        |
|               | PF09112 | -           | -        |
|               | PF09113 | -           | -        |
|               | PF09264 | -           | -        |
|               | PF09458 | -           | -        |
| Mucus         | PF02465 | -           | -        |
|               | PF04225 | -           | -        |
|               | PF06255 | -           | -        |
|               | PF06458 | -           | -        |
|               | PF07195 | -           | -        |
|               | PF08525 | -           | -        |
|               | PF09085 | -           | -        |
| Peptidoglycan | PF01471 | LINAB1_0548 | 4.80E-14 |
|               | PF01476 | -           | -        |
|               | PF03562 | -           | -        |
|               | PF08823 | -           | -        |
| Pili          | PF09374 | -           | -        |
|               | PF00114 | -           | -        |
|               | PF00419 | -           | -        |
|               | PF02432 | -           | -        |
|               | PF03627 | -           | -        |
|               | PF04449 | -           | -        |
|               | PF04619 | -           | -        |
|               | PF04956 | -           | -        |
|               | PF04964 | -           | -        |
|               | PF05211 | -           | -        |
|               | PF05307 | -           | -        |
|               | PF05567 | -           | -        |
|               | PF05946 | -           | -        |
|               | PF06321 | -           | -        |
|               | PF06864 | -           | -        |
|               | PF07419 | -           | -        |
|               | PF07963 | LINAB1_0374 | 0.0004   |
|               |         | LINAB1_0373 | 4.30E-07 |
|               | PF08805 | -           | -        |
|               | PF09160 | -           | -        |
|               | PF09222 | -           | -        |
| Other         | PF10425 | LINAB1_0798 | 1.90E-14 |
|               | PF08428 | LINAB1_0273 | 5.80E-14 |
|               |         | LINAB1_0273 | 5.40E-06 |
|               |         | LINAB1_0273 | 1.60E-08 |

|         |             |          |
|---------|-------------|----------|
|         | LINAB1_0796 | 0.0002   |
|         | LINAB1_0796 | 0.00049  |
|         | LINAB1_0796 | 0.00031  |
|         | LINAB1_0796 | 0.00061  |
|         | LINAB1_0796 | 0.00083  |
|         | LINAB1_0796 | 2.30E-07 |
|         | LINAB1_0796 | 5.70E-05 |
|         | LINAB1_0796 | 3.00E-09 |
|         | LINAB1_0796 | 7.50E-06 |
|         | LINAB1_0796 | 5.40E-08 |
|         | LINAB1_0796 | 4.80E-06 |
|         | LINAB1_0796 | 4.50E-08 |
| PF00746 | LINAB1_0795 | 5.20E-06 |
|         | LINAB1_0796 | 9.70E-05 |
|         | LINAB1_0800 | 4.30E-07 |
|         | LINAB1_0370 | 1.00E-05 |
|         | LINAB1_0273 | 3.60E-05 |
|         | LINAB1_0701 | 3.60E-05 |
| PF04650 | LINAB1_0272 | 5.90E-07 |
|         | LINAB1_0701 | 2.20E-07 |
|         | LINAB1_0795 | 2.10E-06 |
|         | LINAB1_0796 | 8.80E-07 |
|         | LINAB1_0368 | 6.40E-10 |
|         | LINAB1_0800 | 6.80E-09 |
|         | LINAB1_0950 | 2.00E-11 |
